# Supplementary material for: Bacterial endosymbiont Cardinium cSfur genome sequence provides insights for understanding the symbiotic relationship in Sogatella furcifera host
Source: PubMed Central journal article supplement (PMC6147030; doi:10.1186/s12864-018-5078-y), 2018-09-19

**Figure S1.** The genes may be acquired by the event of horizontal gene transfer in *Cardinium* cSfur

A-F: Biotin synthesis genes

G-I: Glycolysis related genes

J-W: Other non-transposase encoding genes

AA-AH: Transposase encoding genes

A: CE557\_856 (bioA: adenosylmethionine-8-amino-7-oxononanoate transaminase)

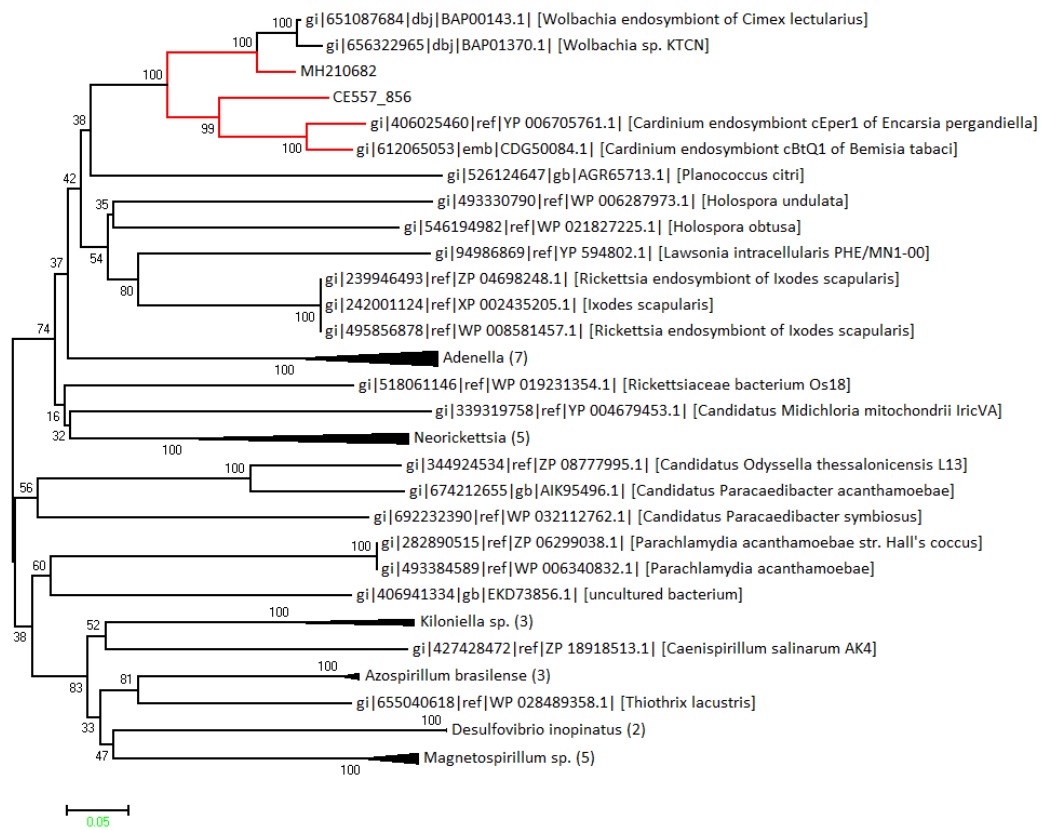

B: CE557\_857 (bioD: dethiobiotin synthase)

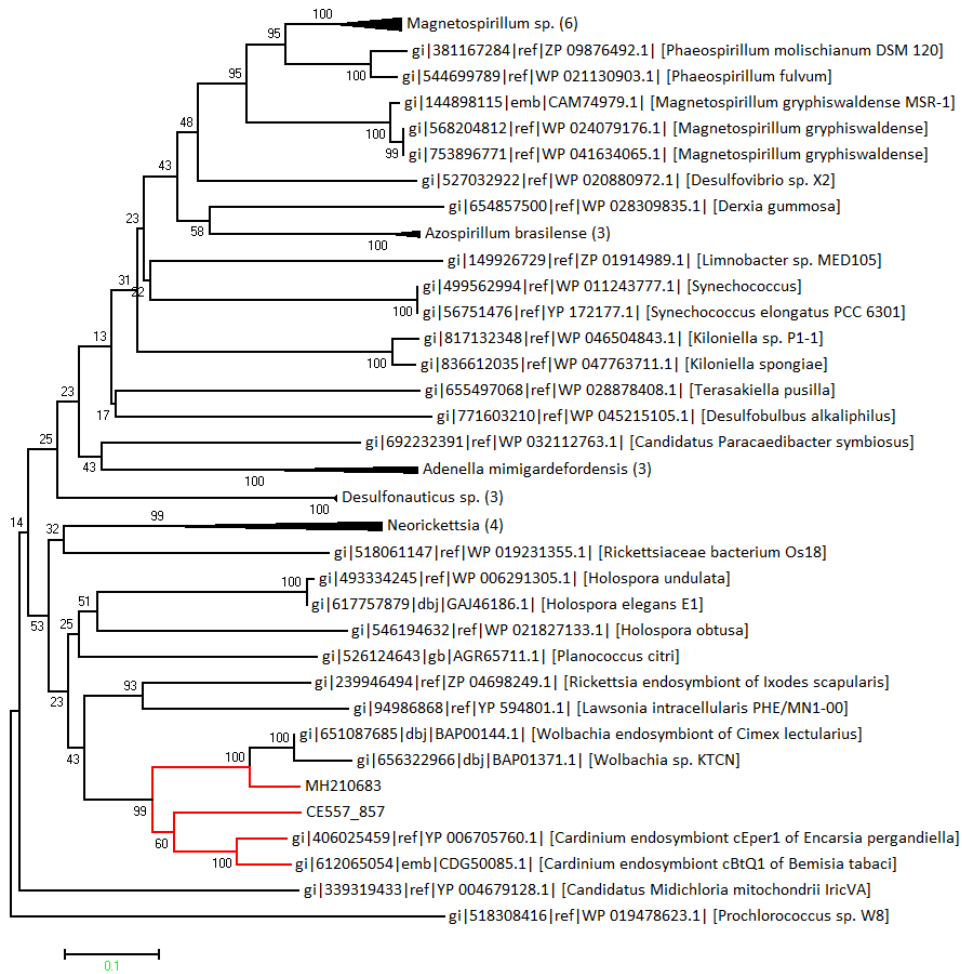

C: CE557\_858 (bioC: malonyl-CoA O-methyltransferase)

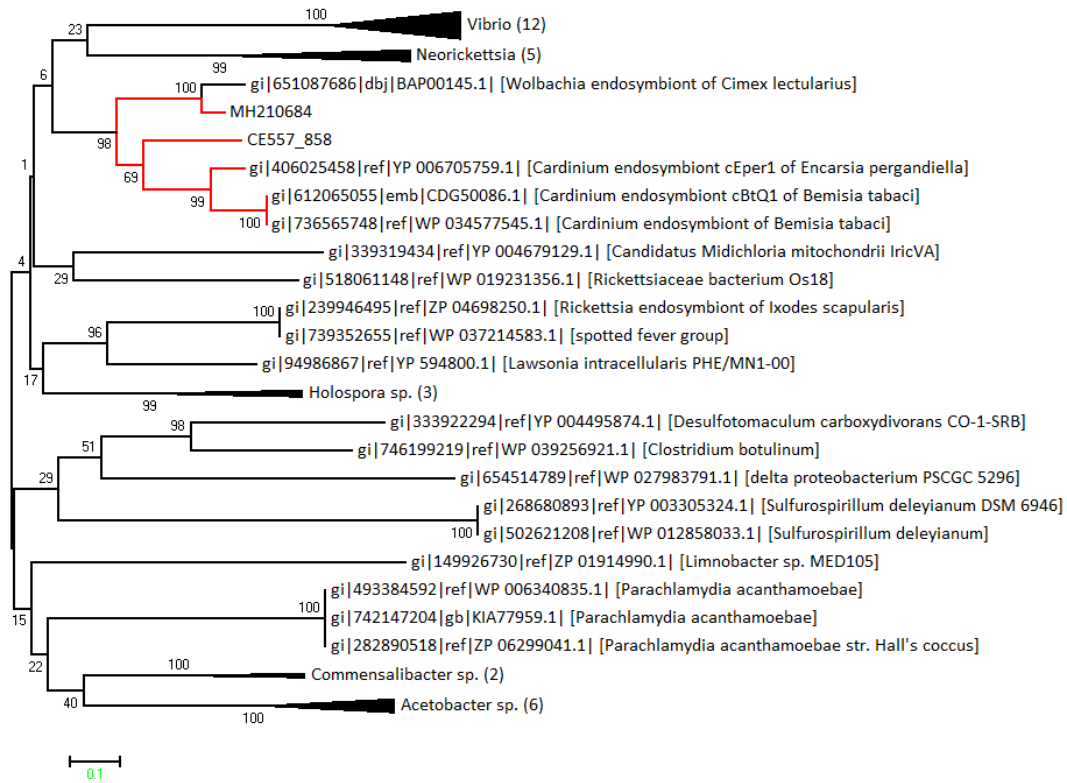

D: CE557\_859 (bioH: pimeloyl-[acyl-carrier protein] methyl ester esterase)

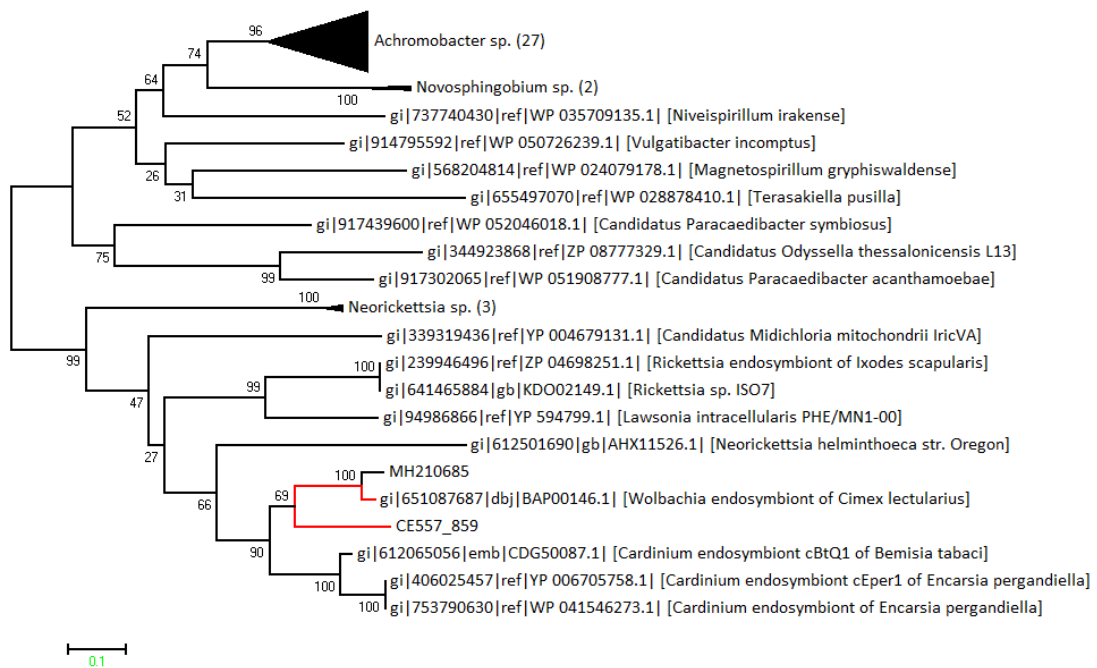

E: CE557\_860 (bioF: 8-amino-7-oxononanoate synthase)

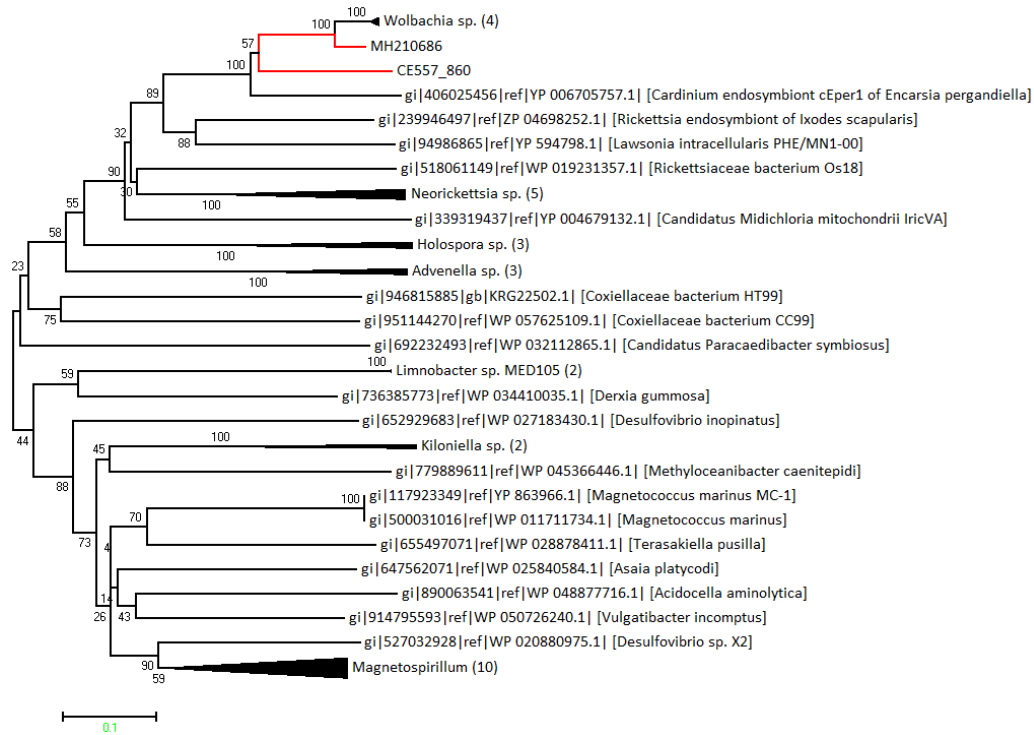

F: CE557\_861 (bioB: biotin synthase)

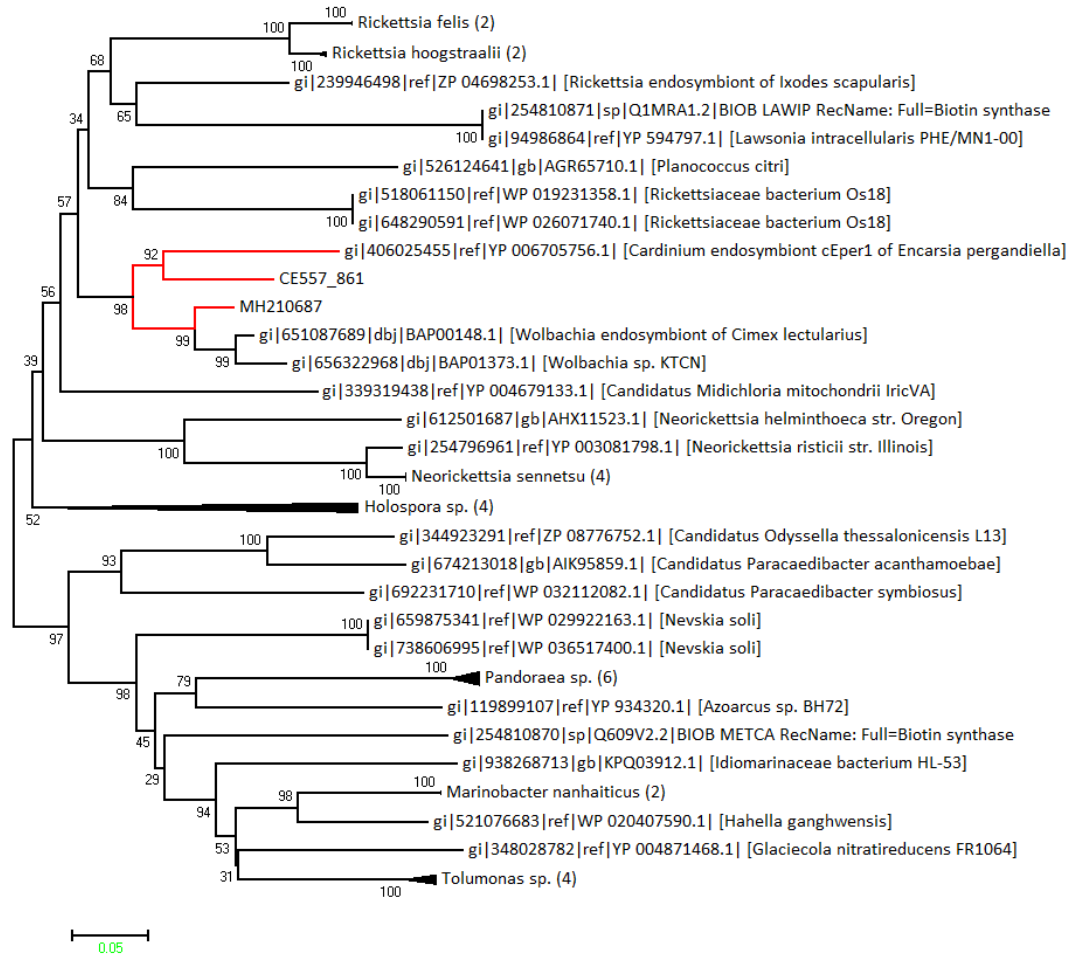

### G: CE557\_218 (ppdK, pyruvate phosphate dikinase)

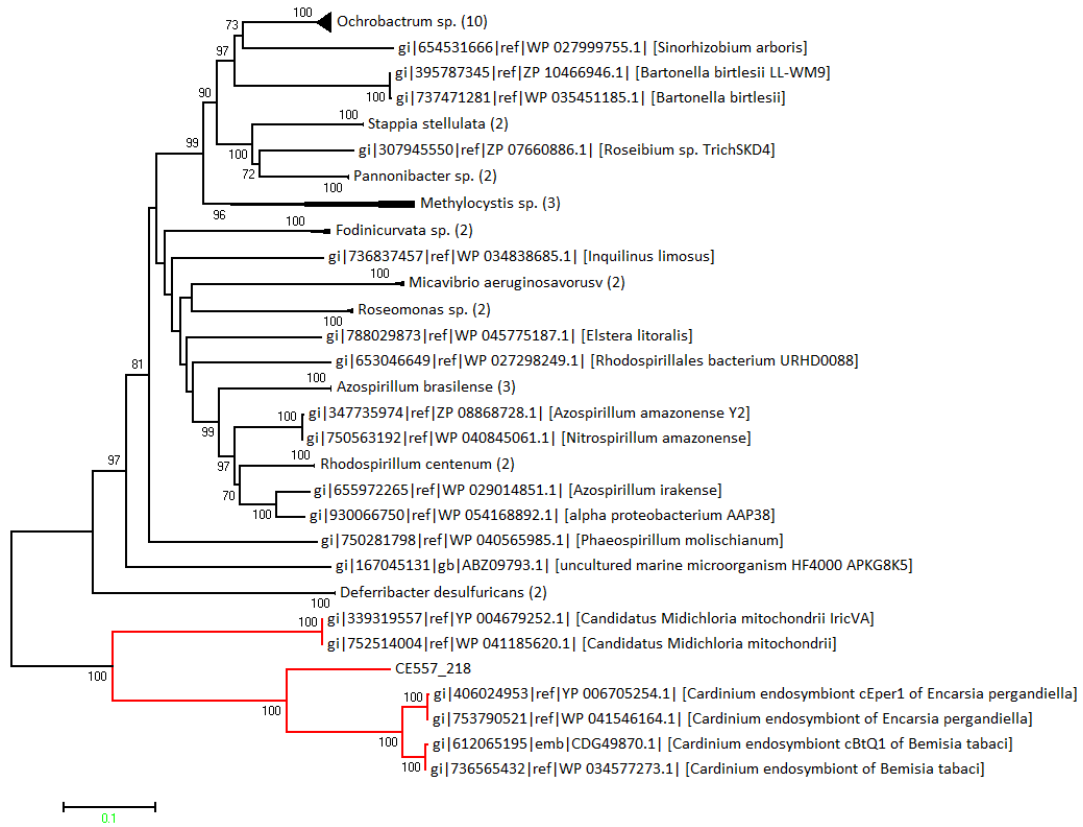

### H: CE557\_596 (gpml, phosphoglyceromutase)

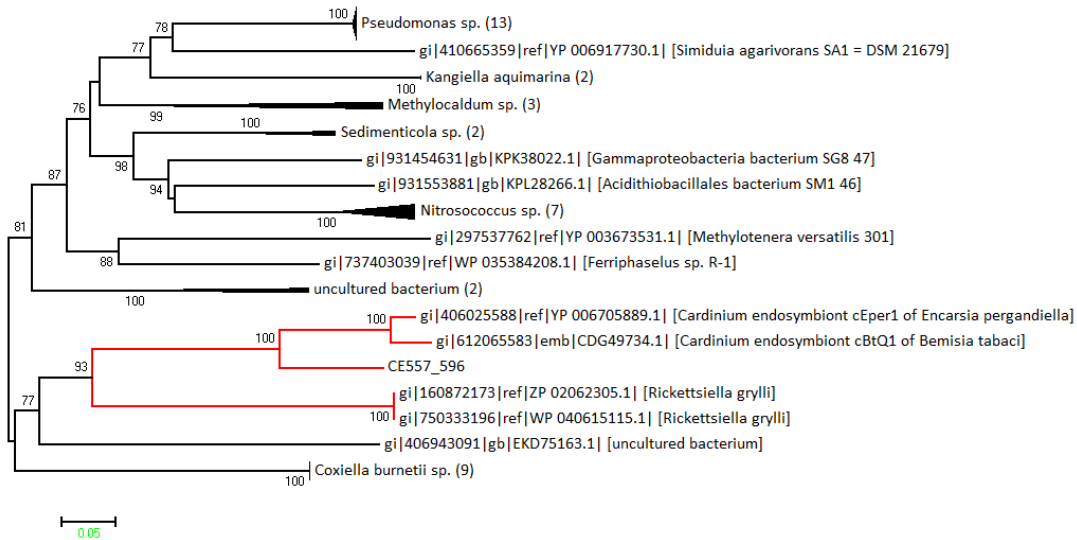

I: CE557\_597 (enolase, phosphopyruvate hydratase)

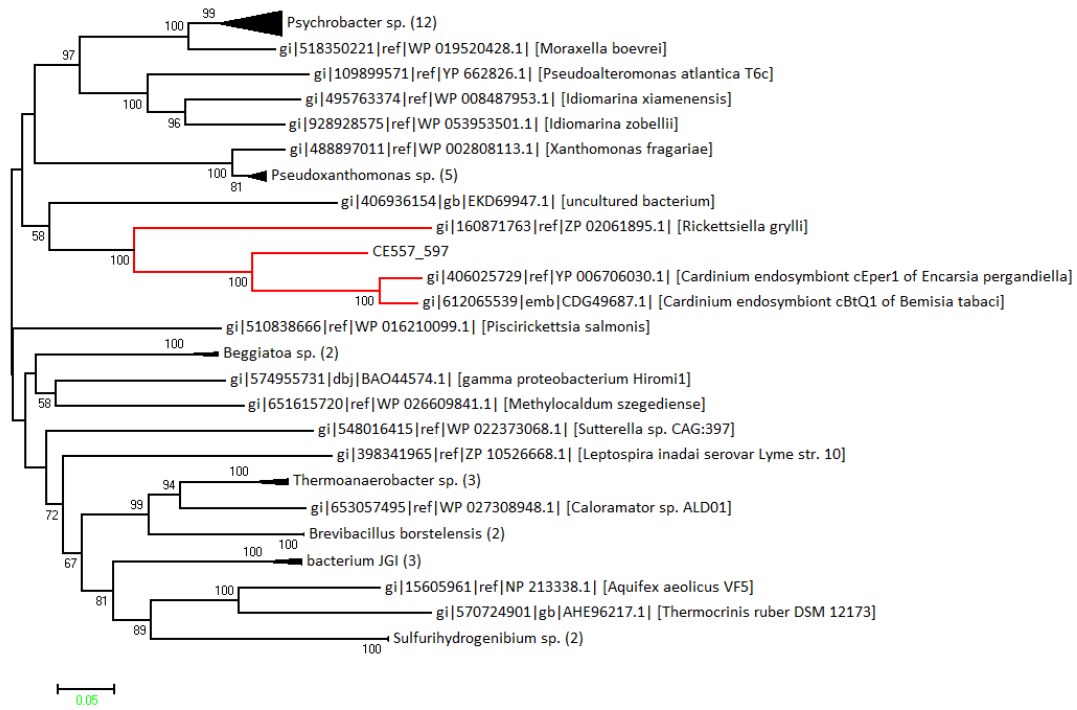

J: CE557\_084 (hypothetical protein)

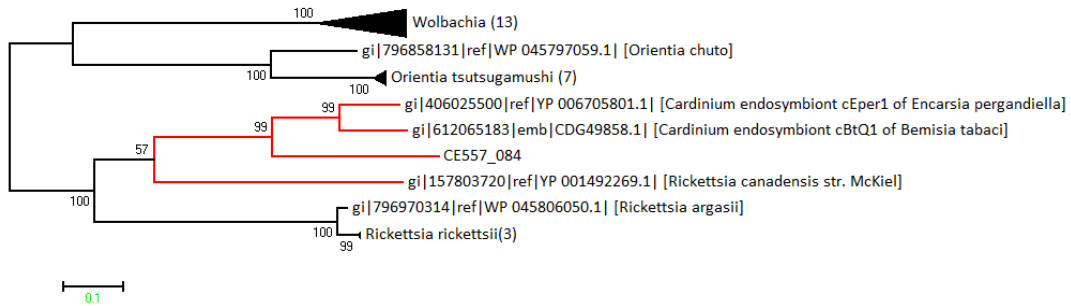

K: CE557\_160 (ankyrin-1-like protein)

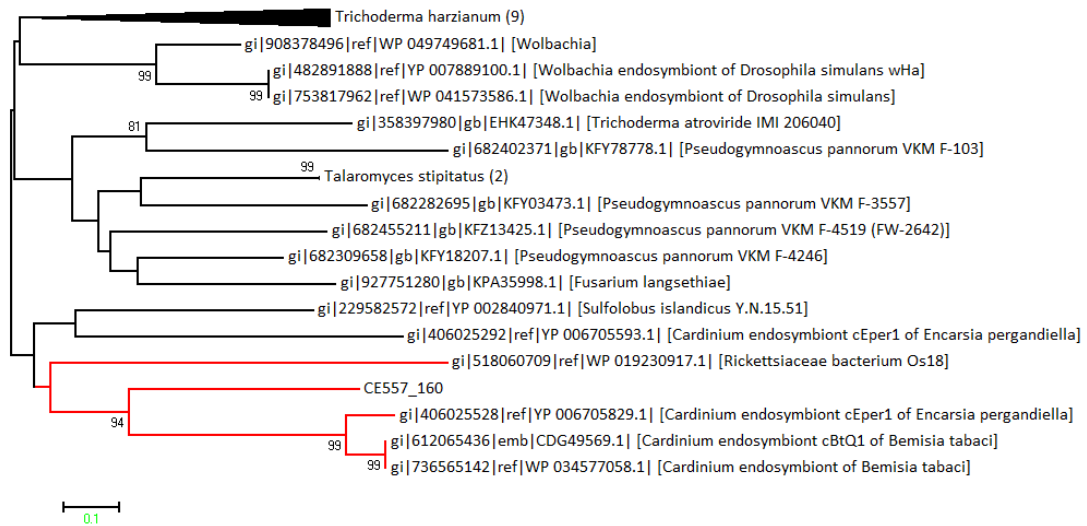

L: CE557\_083 (3-methyladenine DNA glycosylase)

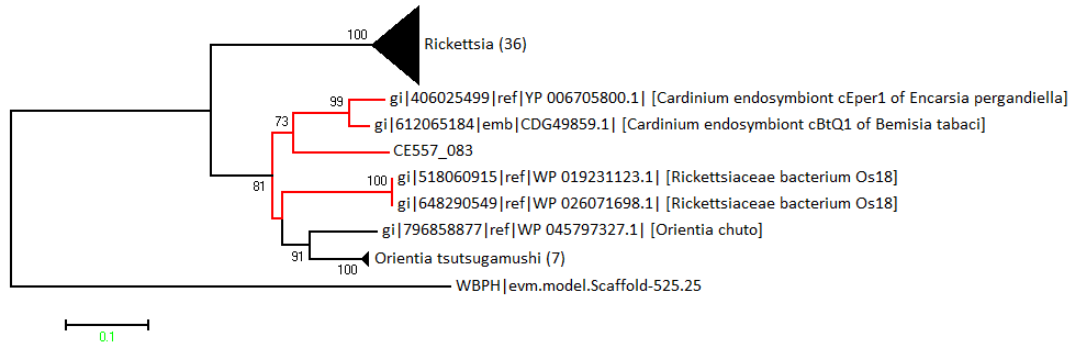

M: CE557\_724 (Ankyrin repeat-containing protein)

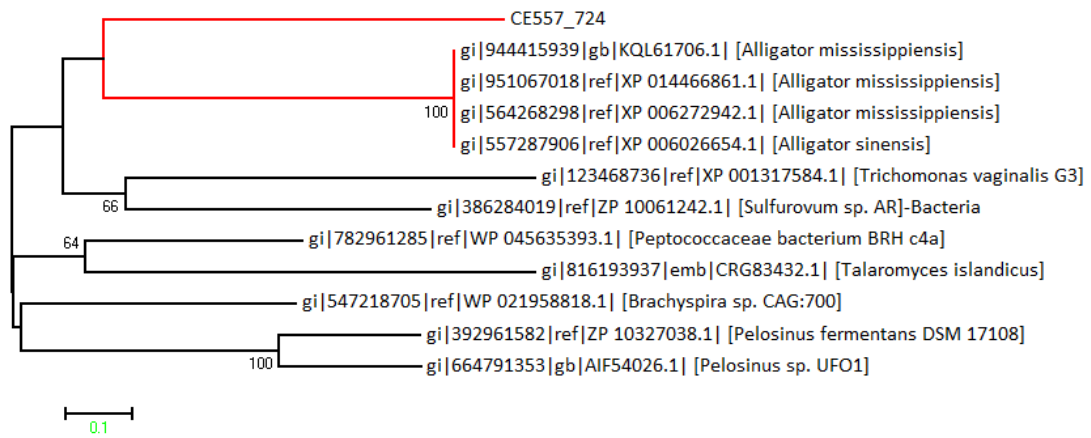

N: CE557\_432 (hypothetical protein)

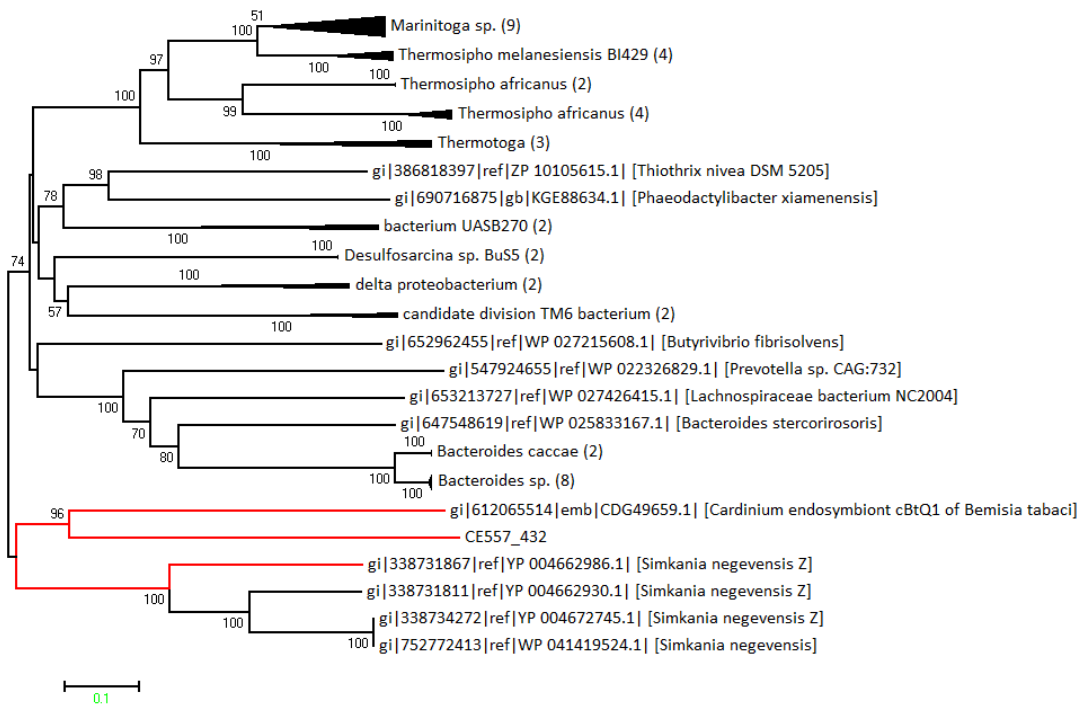

O: CE557\_495 (hypothetical protein)

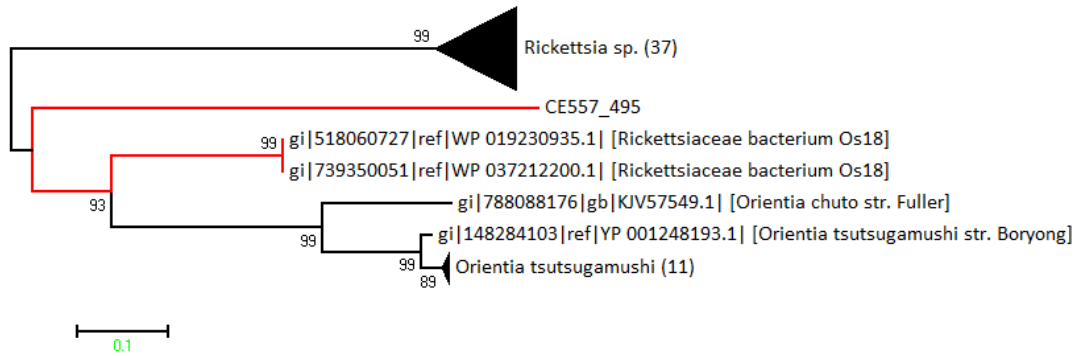

P: CE557\_125 (hypothetical protein)

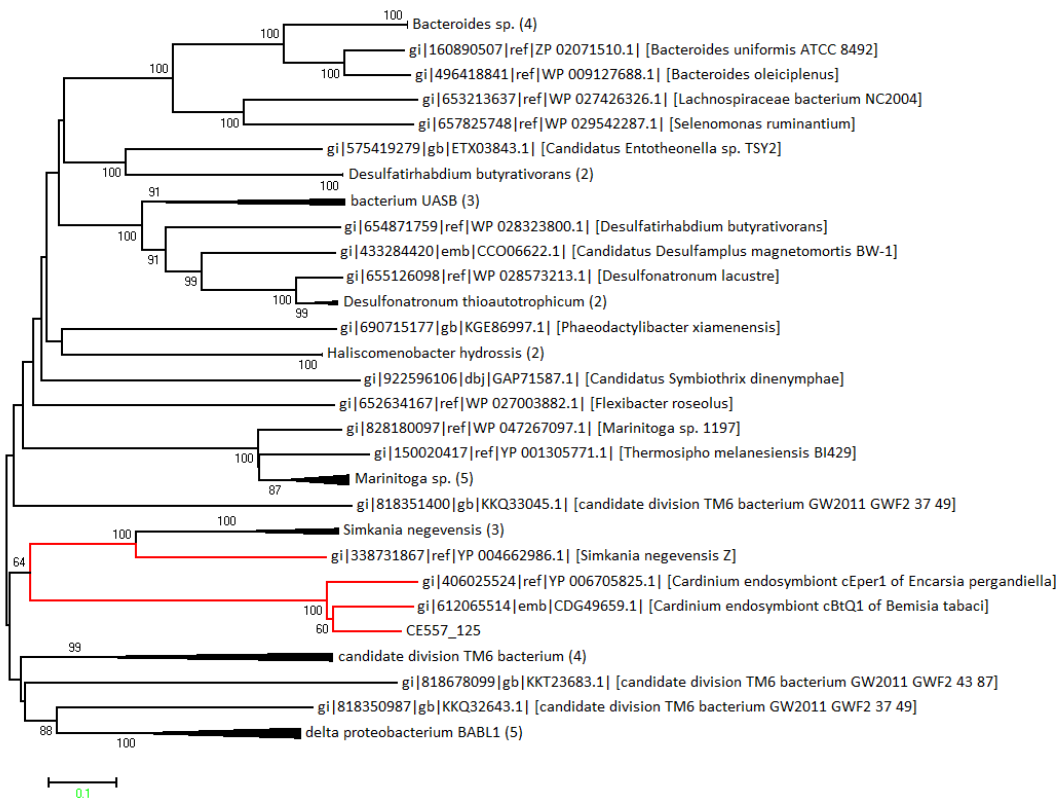



Q: CE557\_056 (putative nacht and ankyrin domain protein)

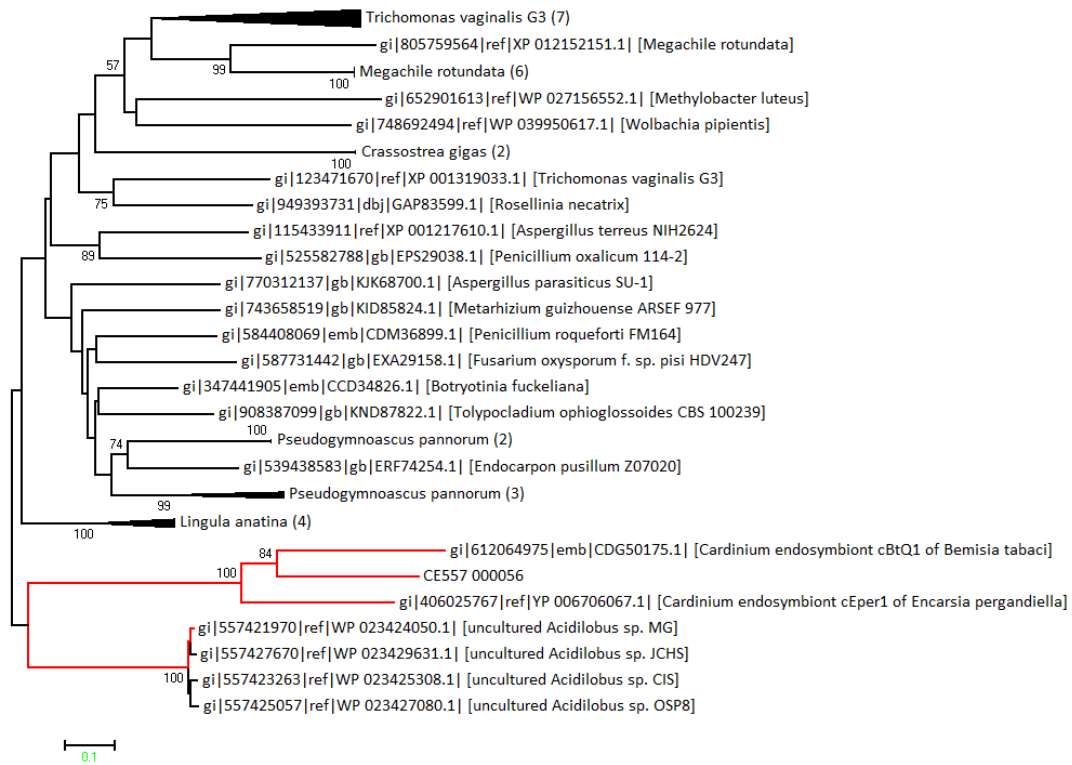

R: CE557\_853 (3-demethylubiquinone-9 3-methyltransferase)

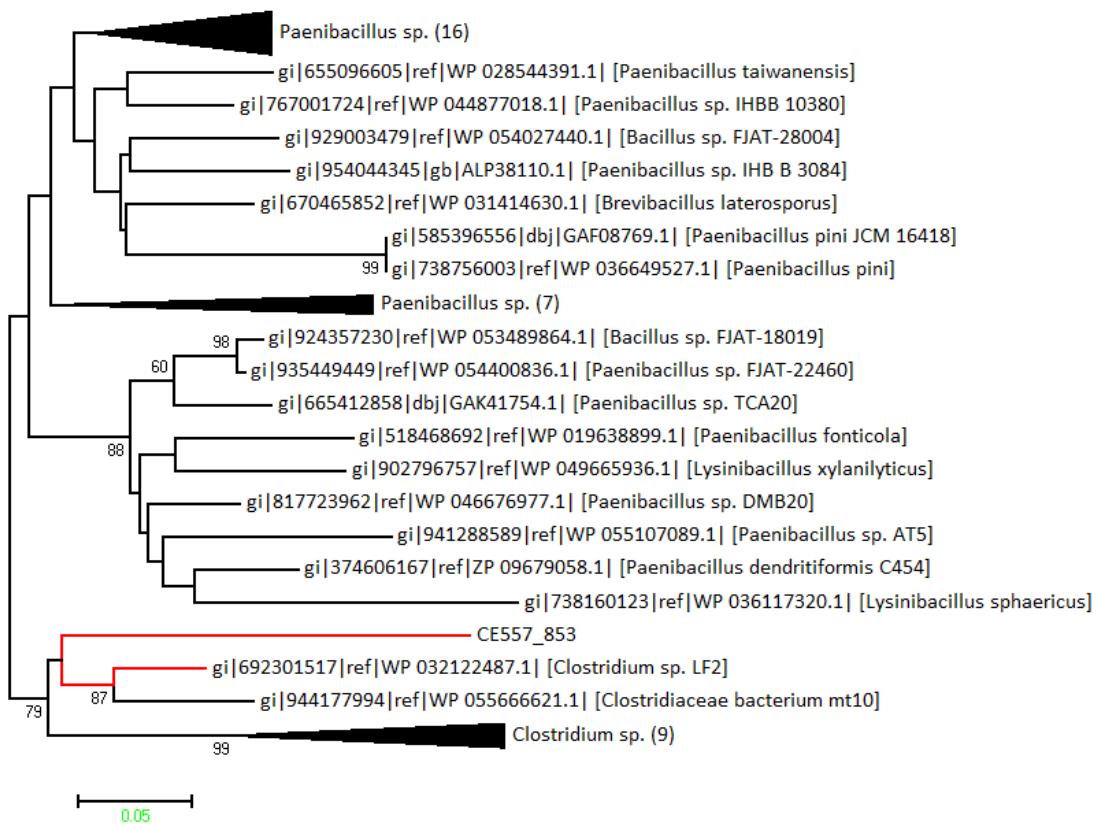

S: CE557\_493 (hypothetical protein)

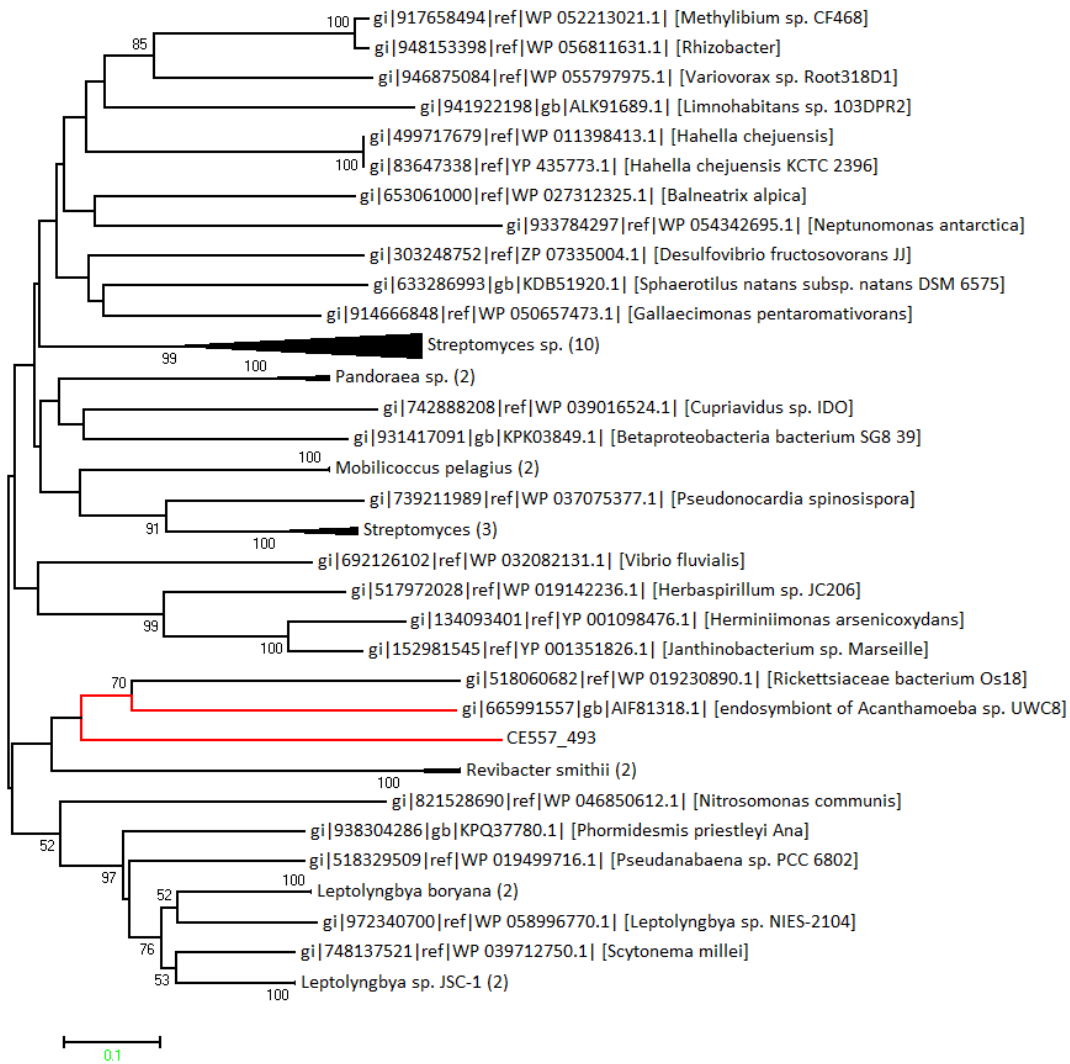

T: CE557\_852 (ABC transporter transmembrane region, putative)

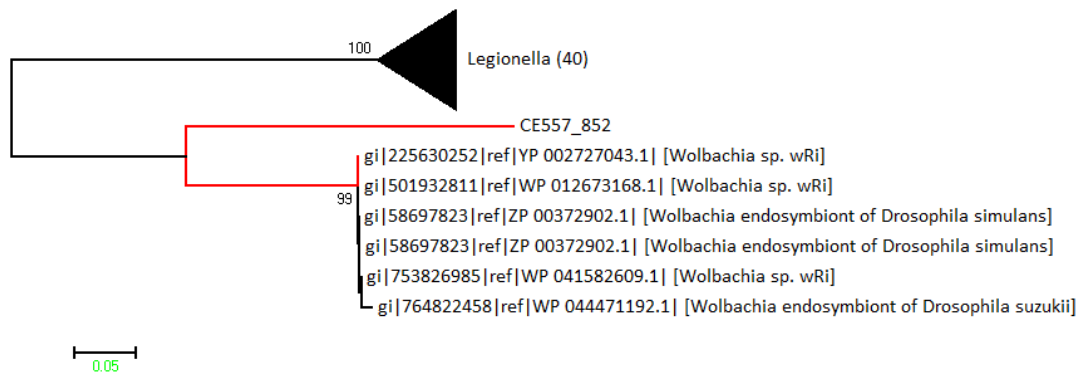

U: CE557\_164 (hypothetical protein)

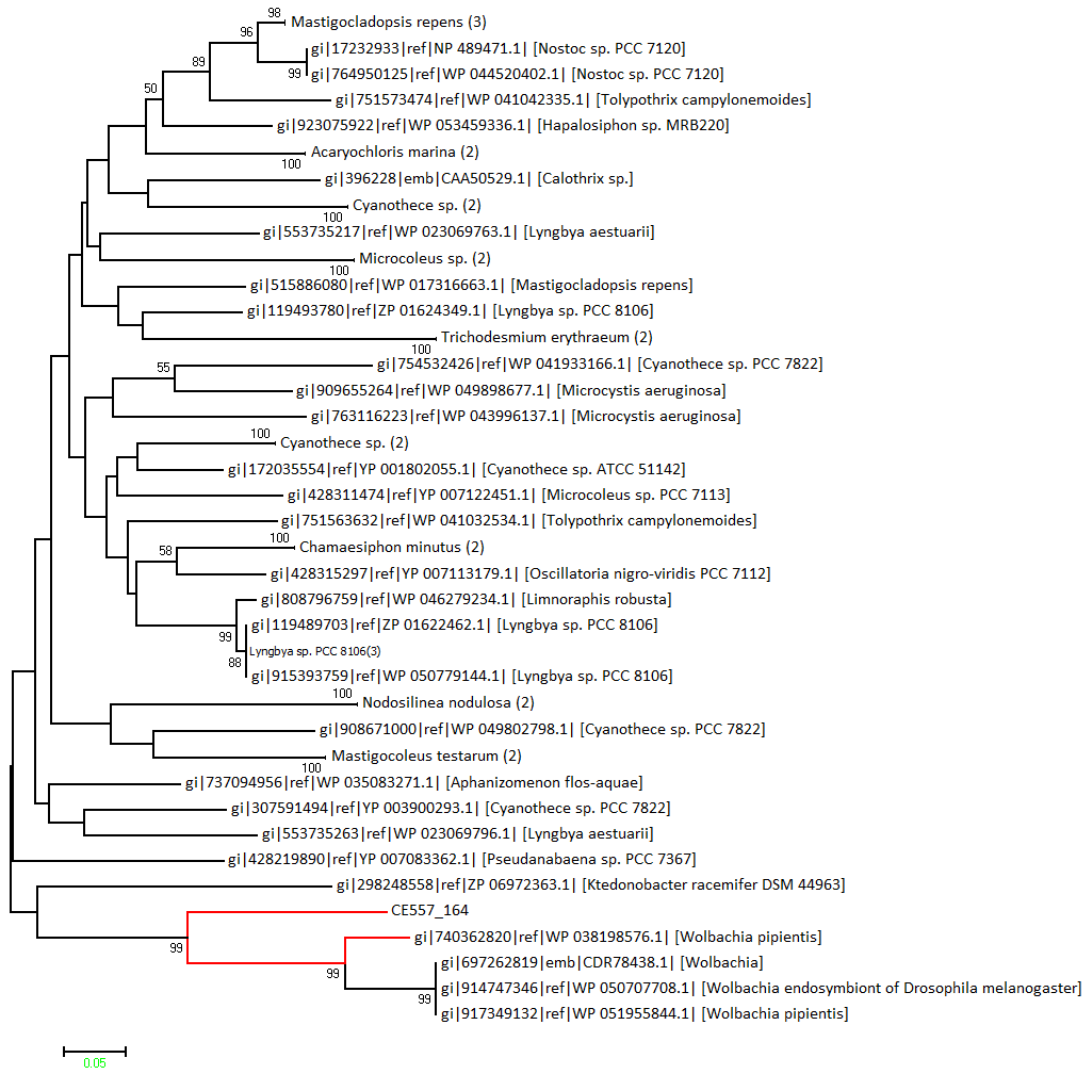

V: CE557\_156 (PIF1 helicase)

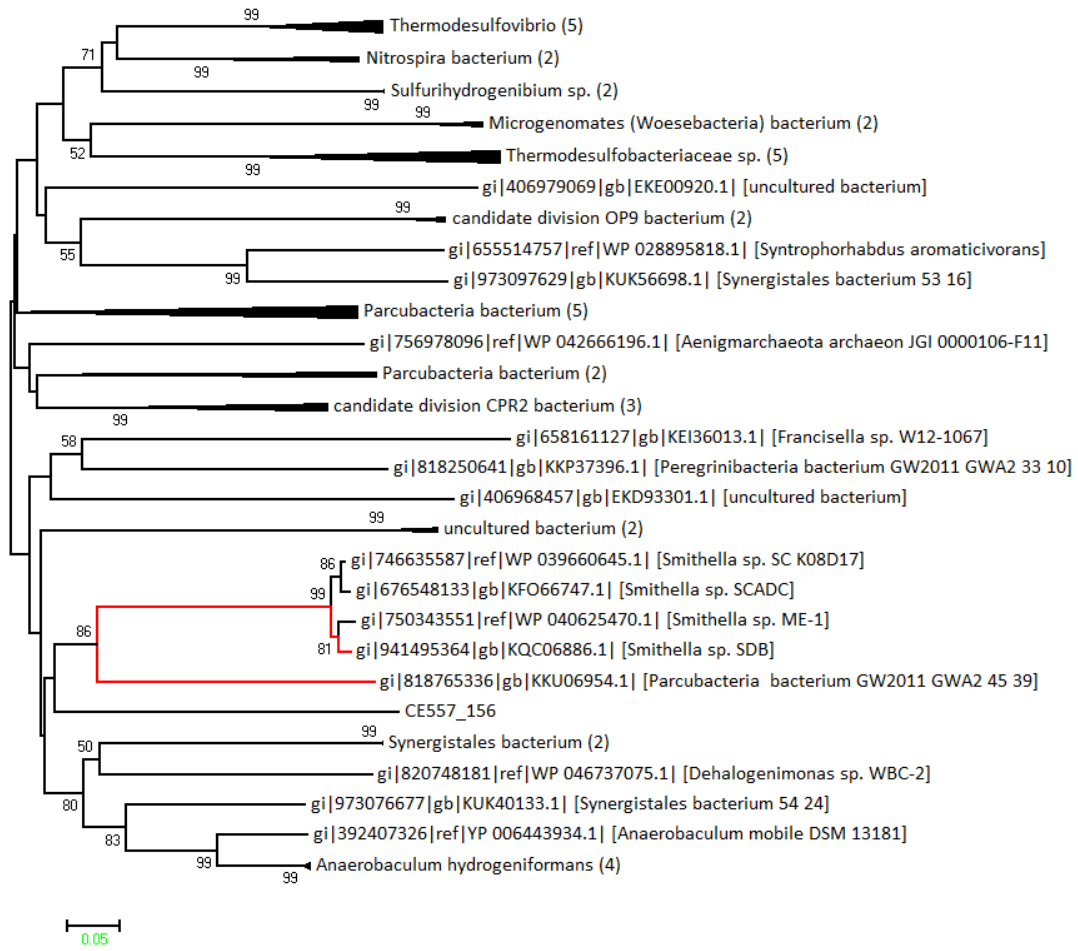

W: CE557\_526 (hypothetical protein)

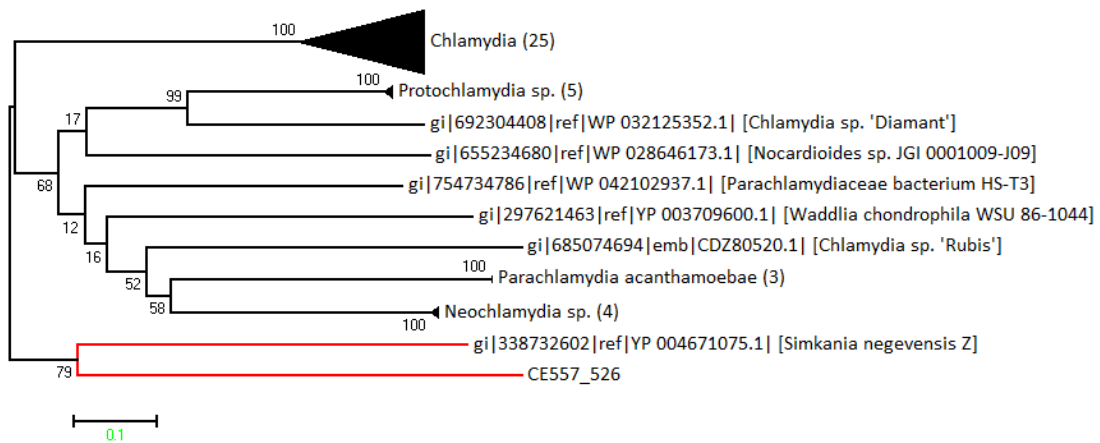

X: CE557\_614 (zinc finger protein OZF-like)

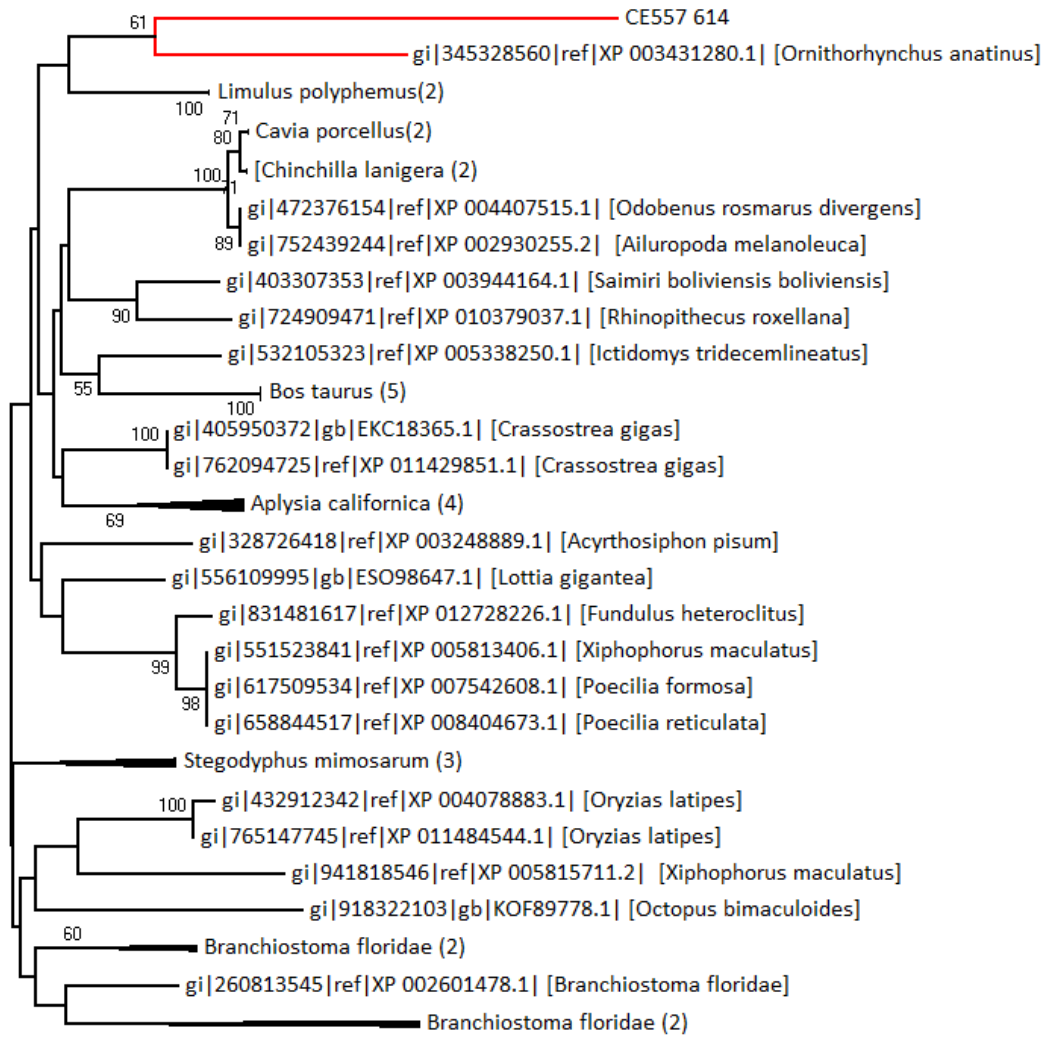

0.05

Y: CE557\_122 (zinc finger protein 419-like)

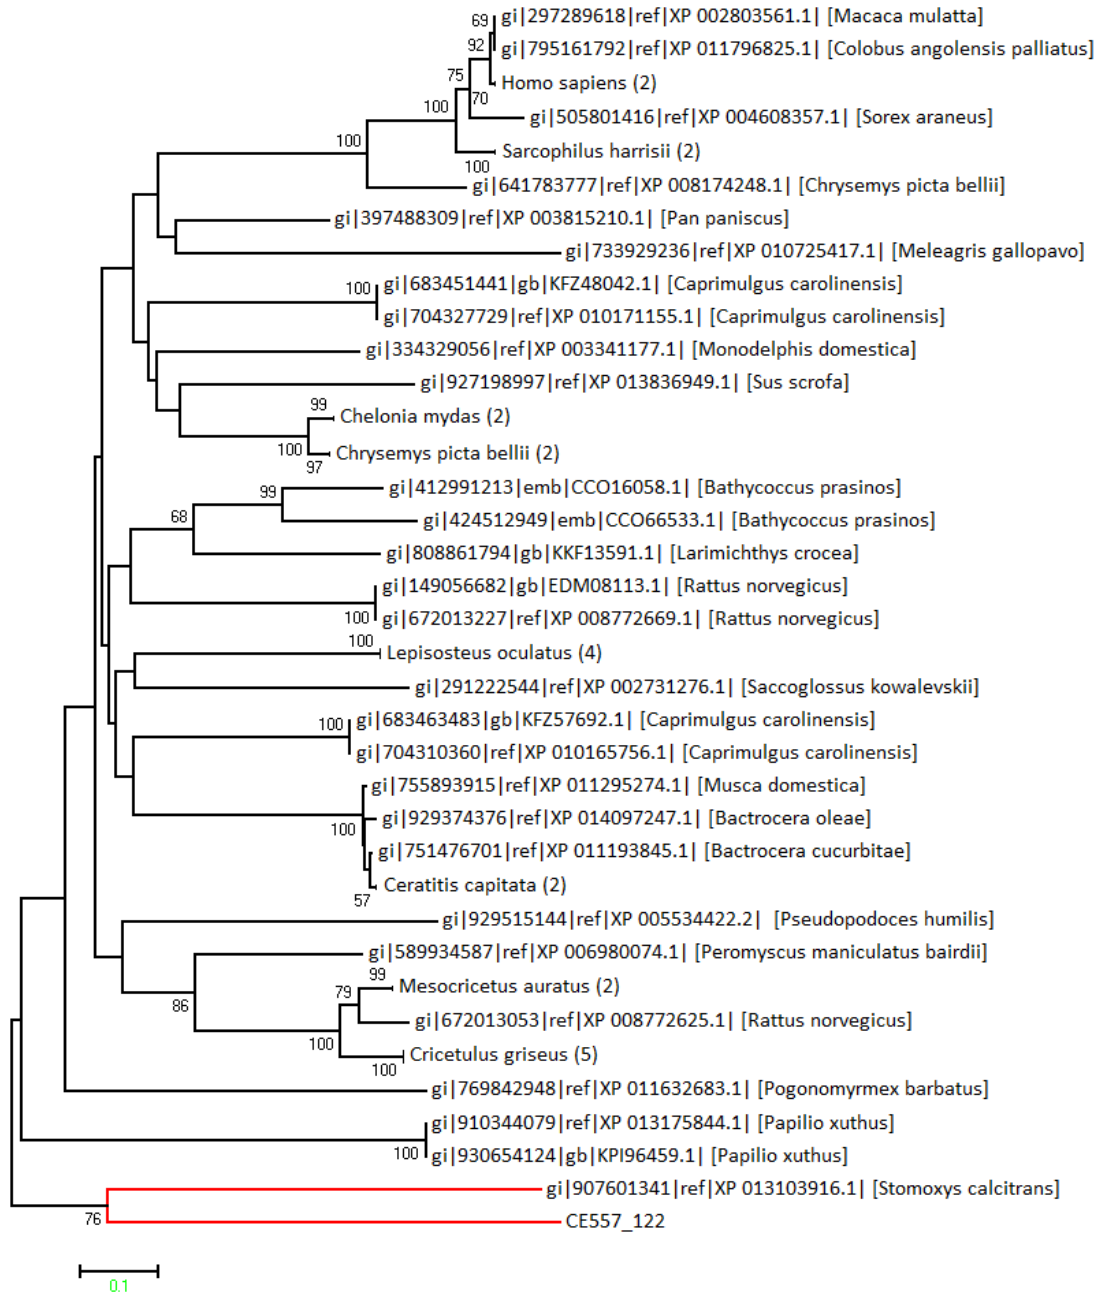

AA: CE557\_044 (hypothetical protein)

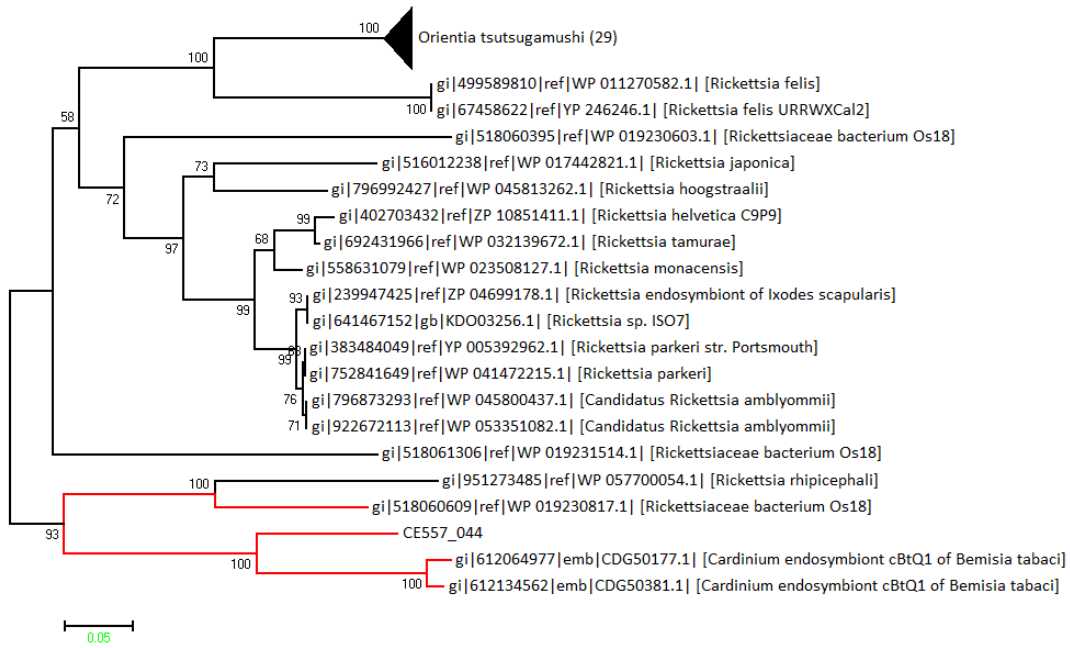

AB: CE557\_153 (integrase core domain protein)

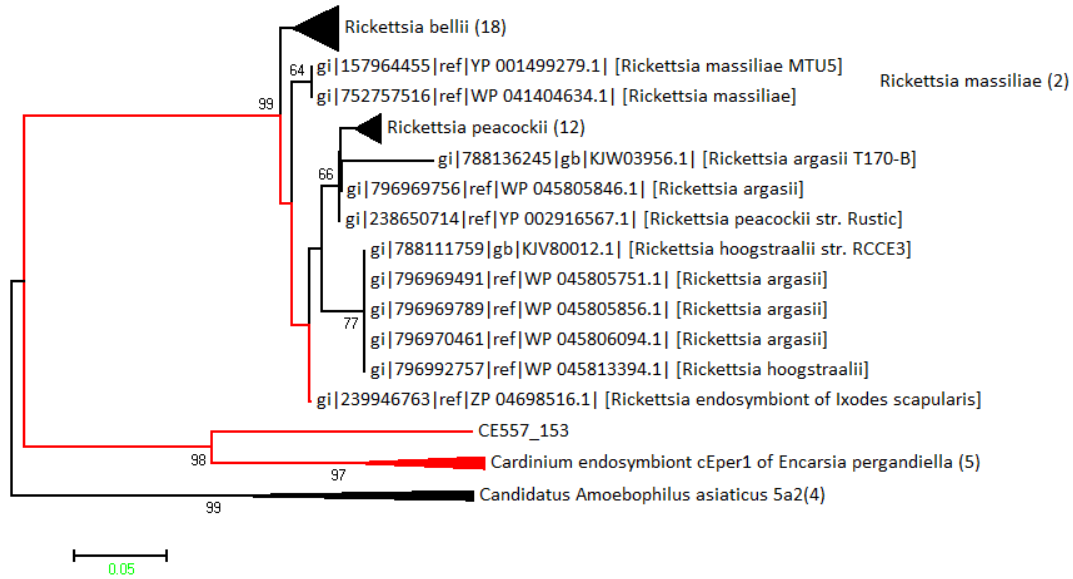

AC: CE557\_354 (hypothetical protein)

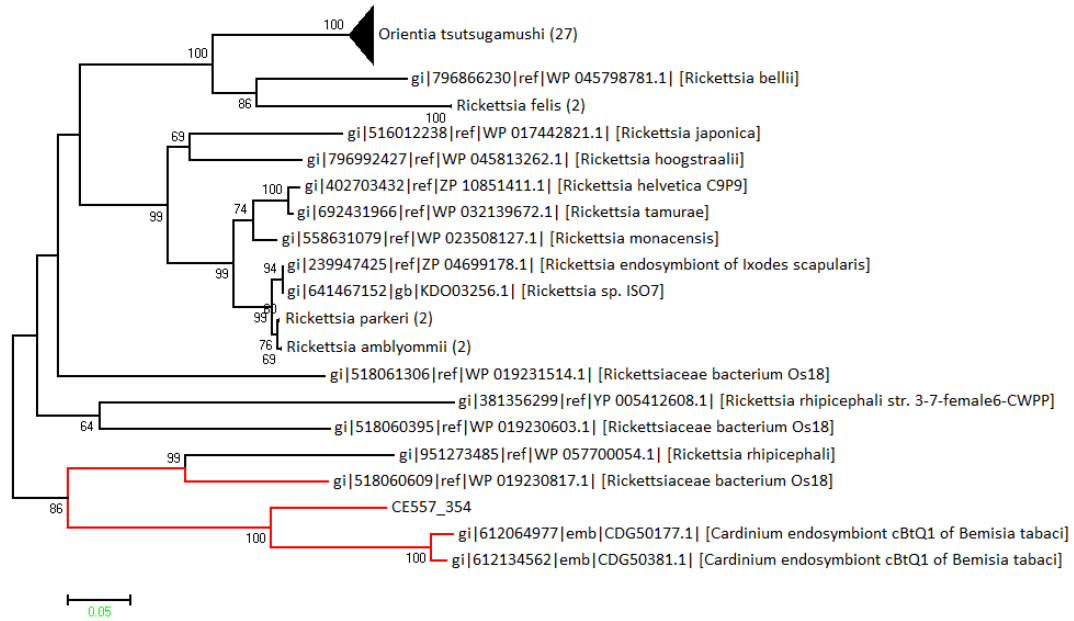

AD: CE557\_043 (hypothetical protein)

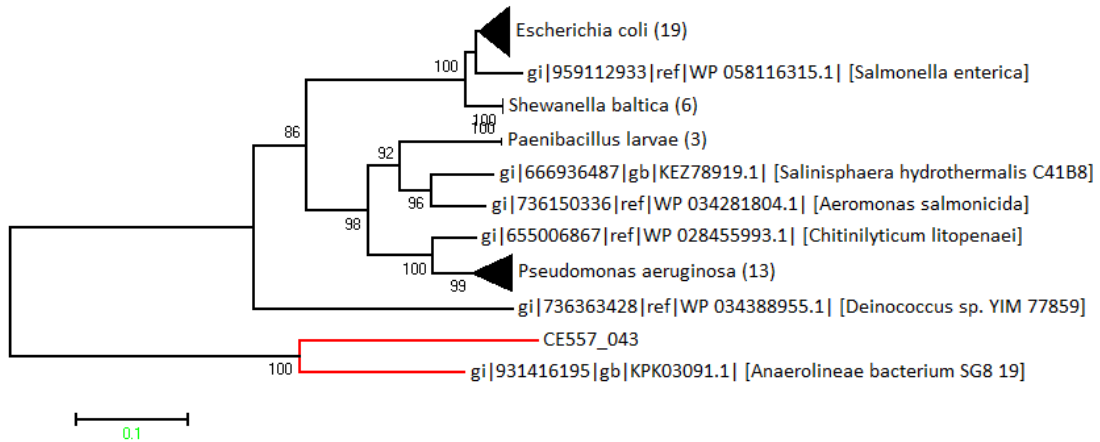



AE: CE557\_635 (hypothetical protein)

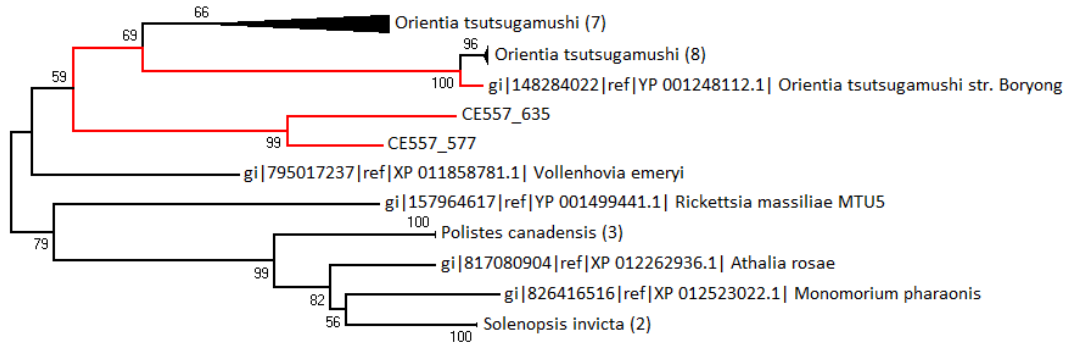

AF: CE557\_773 (hypothetical protein)

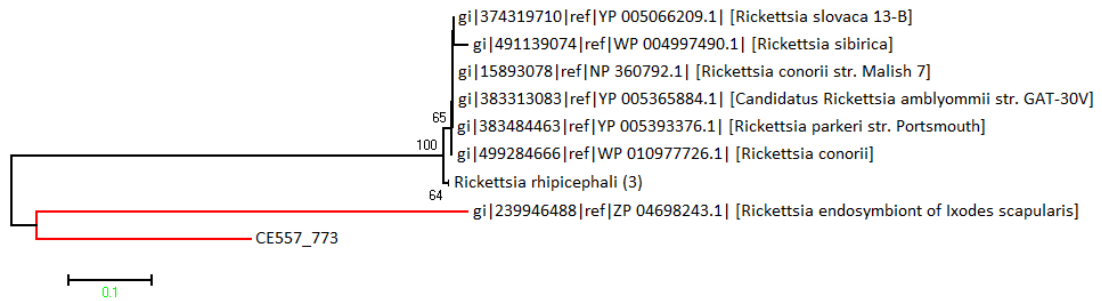

AG: CE557\_251/CE557\_448/CE557\_652 (transposase)

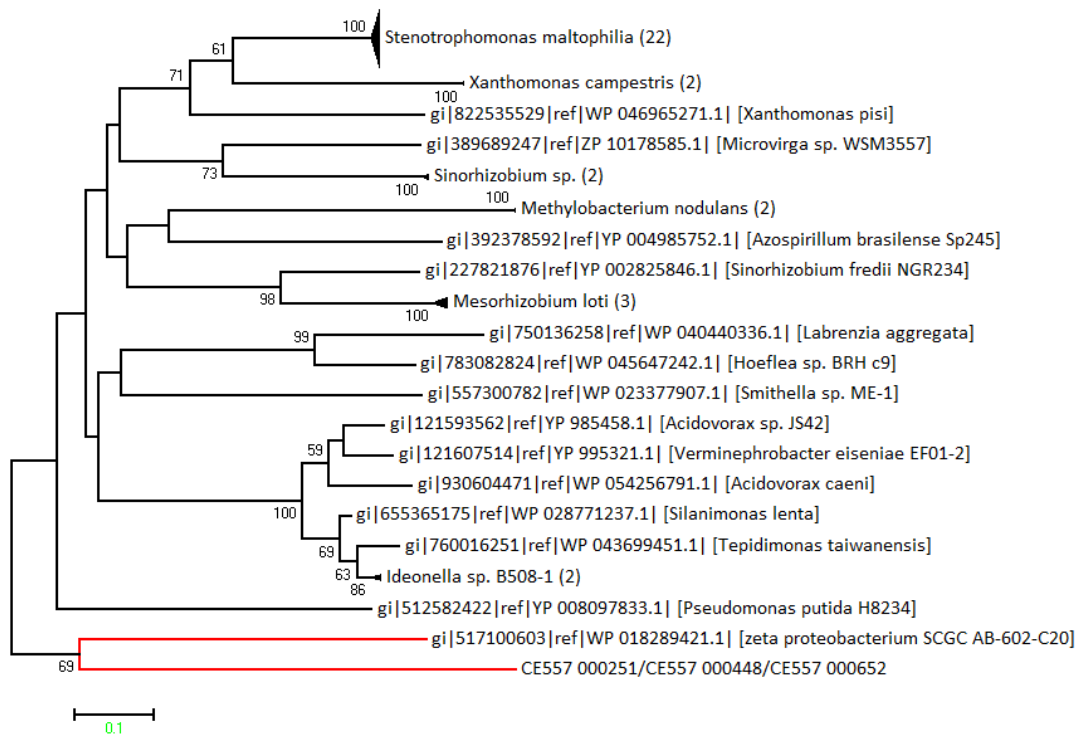

AH: CE557\_175/CE557\_234/CE557\_249/CE557\_446/CE557\_650/CE557\_666  
(hypothetical protein)

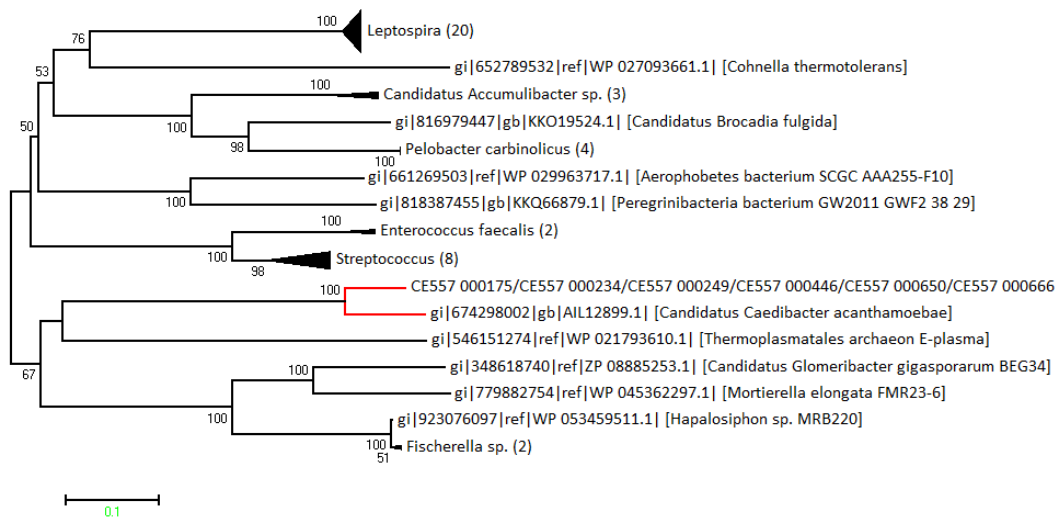

Supplement: 12864_2018_5078_MOESM2_ESM.pdf [file 12864_2018_5078_MOESM2_ESM.pdf]
