# Supplementary material for: Bacterial endosymbiont Cardinium cSfur genome sequence provides insights for understanding the symbiotic relationship in Sogatella furcifera host
Source: PubMed Central journal article supplement (PMC6147030; doi:10.1186/s12864-018-5078-y), 2018-09-19
Supplement: 12864_2018_5078_MOESM8_ESM.pdf [file 12864_2018_5078_MOESM8_ESM.pdf]

### Additional file 3:

#### 1. Pathway statistics of *Cardinium* cSfur

##### Complete pathways:

- C 00010 Glycolysis [PATH:ko00010]
- C 00550 Peptidoglycan biosynthesis [PATH:ko00550]
- C 00780 Biotin metabolism [PATH:ko00780]
- C 00785 Lipoic acid metabolism [PATH:ko00785]

##### Incomplete pathways:

- C 00061 Fatty acid biosynthesis [PATH:ko00061]
- C 00230 Purine metabolism [PATH:ko00230]
- C 00240 Pyrimidine metabolism [PATH:ko00240]
- C 00010 Gluconeogenesis [PATH:ko00010]
- C 00051 Fructose and mannose metabolism [PATH:ko00051]
- C 00500 Starch and sucrose metabolism [PATH:ko00500]
- C 00520 Amino sugar and nucleotide sugar metabolism [PATH:ko00520]
- C 00620 Pyruvate metabolism [PATH:ko00620]
- C 00630 Glyoxylate and dicarboxylate metabolism [PATH:ko00630]
- C 00640 Propanoate metabolism [PATH:ko00640]
- C 00650 Butanoate metabolism [PATH:ko00650]
- C 00562 Inositol phosphate metabolism [PATH:ko00562]
- C 00190 Oxidative phosphorylation [PATH:ko00190]
- C 00195 Photosynthesis [PATH:ko00195]
- C 00710 Carbon fixation in photosynthetic organisms [PATH:ko00710]
- C 00720 Carbon fixation pathways in prokaryotes [PATH:ko00720]
- C 00680 Methane metabolism [PATH:ko00680]
- C 00910 Nitrogen metabolism [PATH:ko00910]
- C 00920 Sulfur metabolism [PATH:ko00920]
- C 00071 Fatty acid degradation [PATH:ko00071]
- C 00561 Glycerolipid metabolism [PATH:ko00561]
- C 00564 Glycerophospholipid metabolism [PATH:ko00564]
- C 00565 Ether lipid metabolism [PATH:ko00565]
- C 01040 Biosynthesis of unsaturated fatty acids [PATH:ko01040]
- C 00590 Arachidonic acid metabolism [PATH:ko00590]
- C 00260 Glycine, serine and threonine metabolism [PATH:ko00260]
- C 00300 Lysine biosynthesis [PATH:ko00300]
- C 00450 Selenocompound metabolism [PATH:ko00450]
- C 00460 Cyanoamino acid metabolism [PATH:ko00460]
- C 00471 D-Glutamine and D-glutamate metabolism [PATH:ko00471]
- C 00473 D-Alanine metabolism [PATH:ko00473]
- C 00480 Glutathione metabolism [PATH:ko00480]
- C 00540 Lipopolysaccharide biosynthesis [PATH:ko00540]
- C 00790 Folate biosynthesis [PATH:ko00790]

- C 00670 One carbon pool by folate [PATH:ko00670]
- C 00860 Porphyrin and chlorophyll metabolism [PATH:ko00860]
- C 00253 Tetracycline biosynthesis [PATH:ko00253]
- C 00523 Polyketide sugar unit biosynthesis [PATH:ko00523]
- C 00521 Streptomycin biosynthesis [PATH:ko00521]

**Nonexistent pathways:**

- C 00020 Citrate cycle (TCA cycle) [PATH:ko00020]
- C 00030 Pentose phosphate pathway [PATH:ko00030]
- C 00040 Pentose and glucuronate interconversions [PATH:ko00040]
- C 00052 Galactose metabolism [PATH:ko00052]
- C 00053 Ascorbate and aldarate metabolism [PATH:ko00053]
- C 00660 C5-Branched dibasic acid metabolism [PATH:ko00660]
- C 00196 Photosynthesis - antenna proteins [PATH:ko00196]
- C 00194 Photosynthesis proteins [BR:ko00194]
- C 00062 Fatty acid elongation [PATH:ko00062]
- C 00072 Synthesis and degradation of ketone bodies [PATH:ko00072]
- C 00073 Cutin, suberine and wax biosynthesis [PATH:ko00073]
- C 00100 Steroid biosynthesis [PATH:ko00100]
- C 00120 Primary bile acid biosynthesis [PATH:ko00120]
- C 00121 Secondary bile acid biosynthesis [PATH:ko00121]
- C 00140 Steroid hormone biosynthesis [PATH:ko00140]
- C 00600 Sphingolipid metabolism [PATH:ko00600]
- C 00591 Linoleic acid metabolism [PATH:ko00591]
- C 00592 alpha-Linolenic acid metabolism [PATH:ko00592]
- C 01004 Lipid biosynthesis proteins [BR:ko01004]
- C 00250 Alanine, aspartate and glutamate metabolism [PATH:ko00250]
- C 00270 Cysteine and methionine metabolism [PATH:ko00270]
- C 00280 Valine, leucine and isoleucine degradation [PATH:ko00280]
- C 00290 Valine, leucine and isoleucine biosynthesis [PATH:ko00290]
- C 00310 Lysine degradation [PATH:ko00310]
- C 00220 Arginine biosynthesis [PATH:ko00220]
- C 00330 Arginine and proline metabolism [PATH:ko00330]
- C 00340 Histidine metabolism [PATH:ko00340]
- C 00350 Tyrosine metabolism [PATH:ko00350]
- C 00360 Phenylalanine metabolism [PATH:ko00360]
- C 00380 Tryptophan metabolism [PATH:ko00380]
- C 00400 Phenylalanine, tyrosine and tryptophan biosynthesis [PATH:ko00400]
- C 01007 Amino acid related enzymes [BR:ko01007]
- C 00410 beta-Alanine metabolism [PATH:ko00410]
- C 00430 Taurine and hypotaurine metabolism [PATH:ko00430]
- C 00440 Phosphonate and phosphinate metabolism [PATH:ko00440]
- C 00472 D-Arginine and D-ornithine metabolism [PATH:ko00472]
- C 01003 Glycosyltransferases [BR:ko01003]

C 00510 N-Glycan biosynthesis [PATH:ko00510]  
C 00513 Various types of N-glycan biosynthesis [PATH:ko00513]  
C 00512 Mucin type O-glycan biosynthesis [PATH:ko00512]  
C 00514 Other types of O-glycan biosynthesis [PATH:ko00514]  
C 00532 Glycosaminoglycan biosynthesis-chondroitin sulfate [PATH:ko00532]  
C 00534 Glycosaminoglycan biosynthesis - heparan sulfate / heparin [PATH:ko00534]  
C 00533 Glycosaminoglycan biosynthesis - keratan sulfate [PATH:ko00533]  
C 00535 Proteoglycans [BR:ko00535]  
C 00536 Glycosaminoglycan binding proteins [BR:ko00536]  
C 00537 Glycosylphosphatidylinositol (GPI)-anchored proteins [BR:ko00537]  
C 00531 Glycosaminoglycan degradation [PATH:ko00531]  
C 00563 Glycosylphosphatidylinositol(GPI)-anchor biosynthesis [PATH:ko00563]  
C 00601 Glycosphingolipid biosynthesis - lacto and neolacto series [PATH:ko00601]  
C 00603 Glycosphingolipid biosynthesis - globo series [PATH:ko00603]  
C 00604 Glycosphingolipid biosynthesis - ganglio series [PATH:ko00604]  
C 01005 Lipopolysaccharide biosynthesis proteins [BR:ko01005]  
C 00730 Thiamine metabolism [PATH:ko00730]  
C 00740 Riboflavin metabolism [PATH:ko00740]  
C 00750 Vitamin B6 metabolism [PATH:ko00750]  
C 00760 Nicotinate and nicotinamide metabolism [PATH:ko00760]  
C 00770 Pantothenate and CoA biosynthesis [PATH:ko00770]  
C 00830 Retinol metabolism [PATH:ko00830]  
C 00130 Ubiquinone and other terpenoid-quinone biosynthesis [PATH:ko00130]  
C 01006 Prenyltransferases [BR:ko01006]  
C 00900 Terpenoid backbone biosynthesis [PATH:ko00900]  
C 00902 Monoterpenoid biosynthesis [PATH:ko00902]  
C 00909 Sesquiterpenoid and triterpenoid biosynthesis [PATH:ko00909]  
C 00904 Diterpenoid biosynthesis [PATH:ko00904]  
C 00906 Carotenoid biosynthesis [PATH:ko00906]  
C 00905 Brassinosteroid biosynthesis [PATH:ko00905]  
C 00981 Insect hormone biosynthesis [PATH:ko00981]  
C 00908 Zeatin biosynthesis [PATH:ko00908]  
C 00903 Limonene and pinene degradation [PATH:ko00903]  
C 00281 Geraniol degradation [PATH:ko00281]  
C 01008 Polyketide biosynthesis proteins [BR:ko01008]  
C 01052 Type I polyketide structures [PATH:ko01052]  
C 00522 Biosynthesis of 12-, 14- and 16-membered macrolides [PATH:ko00522]  
C 01051 Biosynthesis of ansamycins [PATH:ko01051]  
C 01056 Biosynthesis of type II polyketide backbone [PATH:ko01056]  
C 01057 Biosynthesis of type II polyketide products [PATH:ko01057]  
C 01054 Nonribosomal peptide structures [PATH:ko01054]  
C 01053 Biosynthesis of siderophore group nonribosomal peptides [PATH:ko01053]  
C 01055 Biosynthesis of vancomycin group antibiotics [PATH:ko01055]  
C 00940 Phenylpropanoid biosynthesis [PATH:ko00940]

C 00945 Stilbenoid, diarylheptanoid and gingerol biosynthesis [PATH:ko00945]  
C 00941 Flavonoid biosynthesis [PATH:ko00941]  
C 00944 Flavone and flavonol biosynthesis [PATH:ko00944]  
C 00942 Anthocyanin biosynthesis [PATH:ko00942]  
C 00943 Isoflavonoid biosynthesis [PATH:ko00943]  
C 00901 Indole alkaloid biosynthesis [PATH:ko00901]  
C 00403 Indole diterpene alkaloid biosynthesis [PATH:ko00403]  
C 00950 Isoquinoline alkaloid biosynthesis [PATH:ko00950]  
C 00960 Tropane, piperidine and pyridine alkaloid biosynthesis [PATH:ko00960]  
C 01058 Acridone alkaloid biosynthesis [PATH:ko01058]  
C 00232 Caffeine metabolism [PATH:ko00232]  
C 00965 Betalain biosynthesis [PATH:ko00965]  
C 00966 Glucosinolate biosynthesis [PATH:ko00966]  
C 00402 Benzoxazinoid biosynthesis [PATH:ko00402]  
C 00311 Penicillin and cephalosporin biosynthesis [PATH:ko00311]  
C 00332 Carbapenem biosynthesis [PATH:ko00332]  
C 00261 Monobactam biosynthesis [PATH:ko00261]  
C 00331 Clavulanic acid biosynthesis [PATH:ko00331]  
C 00524 Butirosin and neomycin biosynthesis [PATH:ko00524]  
C 00231 Puromycin biosynthesis [PATH:ko00231]  
C 00401 Novobiocin biosynthesis [PATH:ko00401]  
C 00404 Staurosporine biosynthesis [PATH:ko00404]  
C 00254 Aflatoxin biosynthesis [PATH:ko00254]  
C 00362 Benzoate degradation [PATH:ko00362]  
C 00627 Aminobenzoate degradation [PATH:ko00627]  
C 00364 Fluorobenzoate degradation [PATH:ko00364]  
C 00625 Chloroalkane and chloroalkene degradation [PATH:ko00625]  
C 00361 Chlorocyclohexane and chlorobenzene degradation [PATH:ko00361]  
C 00623 Toluene degradation [PATH:ko00623]  
C 00622 Xylene degradation [PATH:ko00622]  
C 00633 Nitrotoluene degradation [PATH:ko00633]  
C 00642 Ethylbenzene degradation [PATH:ko00642]  
C 00643 Styrene degradation [PATH:ko00643]  
C 00791 Atrazine degradation [PATH:ko00791]  
C 00930 Caprolactam degradation [PATH:ko00930]  
C 00351 1,1,1-Trichloro-2,2-bis(4-chlorophenyl)ethane (DDT) degradation [PATH:ko00351]  
C 00363 Bisphenol degradation [PATH:ko00363]  
C 00621 Dioxin degradation [PATH:ko00621]  
C 00626 Naphthalene degradation [PATH:ko00626]  
C 00624 Polycyclic aromatic hydrocarbon degradation [PATH:ko00624]  
C 00365 Furfural degradation [PATH:ko00365]  
C 00984 Steroid degradation [PATH:ko00984]  
C 00980 Metabolism of xenobiotics by cytochrome P450 [PATH:ko00980]  
C 00982 Drug metabolism - cytochrome P450 [PATH:ko00982]

- C 00983 Drug metabolism - other enzymes [PATH:ko00983]
- C 01000 Enzymes [BR:ko01000]
- C 01001 Protein kinases [BR:ko01001]
- C 01009 Protein phosphatase and associated proteins [BR:ko01009]
- C 01002 Peptidases [BR:ko01002]
- C 00199 Cytochrome P450 [BR:ko00199]

## 2. Pathway statistics of *Emticicia oligotrophica* DSM 17448

### Complete pathways:

- C 00010 Glycolysis / Gluconeogenesis [PATH:ko00010]
- C 00020 Citrate cycle (TCA cycle) [PATH:ko00020]
- C 00030 Pentose phosphate pathway [PATH:ko00030]
- C 00040 Pentose and glucuronate interconversions [PATH:ko00040]
- C 00190 Oxidative phosphorylation [PATH:ko00190]
- C 00620 Pyruvate metabolism [PATH:ko00620]
- C 00500 Starch and sucrose metabolism [PATH:ko00500]
- C 00520 Amino sugar and nucleotide sugar metabolism [PATH:ko00520]
- C 00250 Alanine, aspartate and glutamate metabolism [PATH:ko00250]
- C 00061 Fatty acid biosynthesis [PATH:ko00061]
- C 00561 Glycerolipid metabolism [PATH:ko00561]
- C 00220 Arginine biosynthesis [PATH:ko00220]
- C 00330 Arginine and proline metabolism [PATH:ko00330]
- C 00340 Histidine metabolism [PATH:ko00340]
- C 00400 Phenylalanine, tyrosine and tryptophan biosynthesis [PATH:ko00400]
- C 00195 Photosynthesis [PATH:ko00195]
- C 00230 Purine metabolism [PATH:ko00230]
- C 00240 Pyrimidine metabolism [PATH:ko00240]
- C 00540 Lipopolysaccharide biosynthesis [PATH:ko00540]
- C 00550 Peptidoglycan biosynthesis [PATH:ko00550]
- C 00740 Riboflavin metabolism [PATH:ko00740]
- C 00750 Vitamin B6 metabolism [PATH:ko00750]
- C 00780 Biotin metabolism [PATH:ko00780]
- C 00760 Nicotinate and nicotinamide metabolism [PATH:ko00760]
- C 00785 Lipoic acid metabolism [PATH:ko00785]
- C 00720 Carbon fixation pathways in prokaryotes [PATH:ko00720]
- C 00790 Folate biosynthesis [PATH:ko00790]
- C 00770 Pantothenate and CoA biosynthesis [PATH:ko00770]
- C 00640 Propanoate metabolism [PATH:ko00640]

### Incomplete pathways:

- C 00052 Galactose metabolism [PATH:ko00052]
- C 00053 Ascorbate and aldarate metabolism [PATH:ko00053]
- C 00051 Fructose and mannose metabolism [PATH:ko00051]
- C 00630 Glyoxylate and dicarboxylate metabolism [PATH:ko00630]

C 00650 Butanoate metabolism [PATH:ko00650]  
C 00660 C5-Branched dibasic acid metabolism [PATH:ko00660]  
C 00562 Inositol phosphate metabolism [PATH:ko00562]  
C 00680 Methane metabolism [PATH:ko00680]  
C 00910 Nitrogen metabolism [PATH:ko00910]  
C 00920 Sulfur metabolism [PATH:ko00920]  
C 00072 Synthesis and degradation of ketone bodies [PATH:ko00072]  
C 00564 Glycerophospholipid metabolism [PATH:ko00564]  
C 00565 Ether lipid metabolism [PATH:ko00565]  
C 00600 Sphingolipid metabolism [PATH:ko00600]  
C 00590 Arachidonic acid metabolism [PATH:ko00590]  
C 01040 Biosynthesis of unsaturated fatty acids [PATH:ko01040]  
C 00260 Glycine, serine and threonine metabolism [PATH:ko00260]  
C 00270 Cysteine and methionine metabolism [PATH:ko00270]  
C 00280 Valine, leucine and isoleucine degradation [PATH:ko00280]  
C 00290 Valine, leucine and isoleucine biosynthesis [PATH:ko00290]  
C 00300 Lysine biosynthesis [PATH:ko00300]  
C 00310 Lysine degradation [PATH:ko00310]  
C 00350 Tyrosine metabolism [PATH:ko00350]  
C 00360 Phenylalanine metabolism [PATH:ko00360]  
C 00380 Tryptophan metabolism [PATH:ko00380]  
C 00410 beta-Alanine metabolism [PATH:ko00410]  
C 00430 Taurine and hypotaurine metabolism [PATH:ko00430]  
C 00440 Phosphonate and phosphinate metabolism [PATH:ko00440]  
C 00450 Selenocompound metabolism [PATH:ko00450]  
C 00460 Cyanoamino acid metabolism [PATH:ko00460]  
C 00471 D-Glutamine and D-glutamate metabolism [PATH:ko00471]  
C 00472 D-Arginine and D-ornithine metabolism [PATH:ko00472]  
C 00473 D-Alanine metabolism [PATH:ko00473]  
C 00480 Glutathione metabolism [PATH:ko00480]  
C 00510 N-Glycan biosynthesis [PATH:ko00510]  
C 00513 Various types of N-glycan biosynthesis [PATH:ko00513]  
C 00604 Glycosphingolipid biosynthesis - ganglio series [PATH:ko00604]  
C 00511 Other glycan degradation [PATH:ko00511]  
C 00571 Lipoarabinomannan (LAM) biosynthesis [PATH:ko00571]  
C 00730 Thiamine metabolism [PATH:ko00730]  
C 00785 Lipoic acid metabolism [PATH:ko00785]  
C 00670 One carbon pool by folate [PATH:ko00670]  
C 00130 Ubiquinone and other terpenoid-quinone biosynthesis [PATH:ko00130]  
C 00900 Terpenoid backbone biosynthesis [PATH:ko00900]  
C 00908 Zeatin biosynthesis [PATH:ko00908]  
C 00903 Limonene and pinene degradation [PATH:ko00903]  
C 00281 Geraniol degradation [PATH:ko00281]  
C 01055 Biosynthesis of vancomycin group antibiotics [PATH:ko01055]

- C 00940 Phenylpropanoid biosynthesis [PATH:ko00940]
- C 00960 Tropane, piperidine and pyridine alkaloid biosynthesis [PATH:ko00960]
- C 00966 Glucosinolate biosynthesis [PATH:ko00966]
- C 00332 Carbapenem biosynthesis [PATH:ko00332]
- C 00261 Monobactam biosynthesis [PATH:ko00261]
- C 00524 Neomycin, kanamycin and gentamicin biosynthesis [PATH:ko00524]
- C 00525 Acarbose and validamycin biosynthesis [PATH:ko00525]
- C 00333 Prodigiosin biosyntheses [PATH:ko00333]
- C 00362 Benzoate degradation [PATH:ko00362]
- C 00627 Aminobenzoate degradation [PATH:ko00627]
- C 00364 Fluorobenzoate degradation [PATH:ko00364]
- C 00625 Chloroalkane and chloroalkene degradation [PATH:ko00625]
- C 00361 Chlorocyclohexane and chlorobenzene degradation [PATH:ko00361]
- C 00623 Toluene degradation [PATH:ko00623]
- C 00622 Xylene degradation [PATH:ko00622]
- C 00633 Nitrotoluene degradation [PATH:ko00633]
- C 00642 Ethylbenzene degradation [PATH:ko00642]
- C 00643 Styrene degradation [PATH:ko00643]
- C 00983 Drug metabolism - other enzymes [PATH:ko00983]

**Nonexistent pathways:**

- C 00196 Photosynthesis - antenna proteins [PATH:ko00196]
- C 00710 Carbon fixation in photosynthetic organisms [PATH:ko00710]
- C 00062 Fatty acid elongation [PATH:ko00062]
- C 00071 Fatty acid degradation [PATH:ko00071]
- C 00073 Cutin, suberine and wax biosynthesis [PATH:ko00073]
- C 00100 Steroid biosynthesis [PATH:ko00100]
- C 00120 Primary bile acid biosynthesis [PATH:ko00120]
- C 00121 Secondary bile acid biosynthesis [PATH:ko00121]
- C 00140 Steroid hormone biosynthesis [PATH:ko00140]
- C 00591 Linoleic acid metabolism [PATH:ko00591]
- C 00592 alpha-Linolenic acid metabolism [PATH:ko00592]
- C 00512 Mucin type O-glycan biosynthesis [PATH:ko00512]
- C 00515 Mannose type O-glycan biosynthesis [PATH:ko00515]
- C 00514 Other types of O-glycan biosynthesis [PATH:ko00514]
- C 00532 Glycosaminoglycan biosynthesis - chondroitin sulfate / dermatan sulfate [PATH:ko00532]
- C 00534 Glycosaminoglycan biosynthesis - heparan sulfate / heparin [PATH:ko00534]
- C 00533 Glycosaminoglycan biosynthesis - keratan sulfate [PATH:ko00533]
- C 00531 Glycosaminoglycan degradation [PATH:ko00531]
- C 00563 Glycosylphosphatidylinositol(GPI)-anchor biosynthesis [PATH:ko00563]
- C 00601 Glycosphingolipid biosynthesis - lacto and neolacto series [PATH:ko00601]
- C 00603 Glycosphingolipid biosynthesis - globo and isoglobo series [PATH:ko00603]
- C 00830 Retinol metabolism [PATH:ko00830]

C 00860 Porphyrin and chlorophyll metabolism [PATH:ko00860]  
C 00902 Monoterpenoid biosynthesis [PATH:ko00902]  
C 00909 Sesquiterpenoid and triterpenoid biosynthesis [PATH:ko00909]  
C 00904 Diterpenoid biosynthesis [PATH:ko00904]  
C 00906 Carotenoid biosynthesis [PATH:ko00906]  
C 00902 Monoterpenoid biosynthesis [PATH:ko00902]  
C 00909 Sesquiterpenoid and triterpenoid biosynthesis [PATH:ko00909]  
C 00904 Diterpenoid biosynthesis [PATH:ko00904]  
C 00906 Carotenoid biosynthesis [PATH:ko00906]  
C 01052 Type I polyketide structures [PATH:ko01052]  
C 00522 Biosynthesis of 12-, 14- and 16-membered macrolides [PATH:ko00522]  
C 01051 Biosynthesis of ansamycins [PATH:ko01051]  
C 01059 Biosynthesis of enediyne antibiotics [PATH:ko01059]  
C 01056 Biosynthesis of type II polyketide backbone [PATH:ko01056]  
C 01057 Biosynthesis of type II polyketide products [PATH:ko01057]  
C 00253 Tetracycline biosynthesis [PATH:ko00253]  
C 00523 Polyketide sugar unit biosynthesis [PATH:ko00523]  
C 01054 Nonribosomal peptide structures [PATH:ko01054]  
C 01053 Biosynthesis of siderophore group nonribosomal peptides [PATH:ko01053]  
C 00945 Stilbenoid, diarylheptanoid and gingerol biosynthesis [PATH:ko00945]  
C 00941 Flavonoid biosynthesis [PATH:ko00941]  
C 00944 Flavone and flavonol biosynthesis [PATH:ko00944]  
C 00942 Anthocyanin biosynthesis [PATH:ko00942]  
C 00943 Isoflavonoid biosynthesis [PATH:ko00943]  
C 00901 Indole alkaloid biosynthesis [PATH:ko00901]  
C 00403 Indole diterpene alkaloid biosynthesis [PATH:ko00403]  
C 00950 Isoquinoline alkaloid biosynthesis [PATH:ko00950]  
C 01058 Acridone alkaloid biosynthesis [PATH:ko01058]  
C 00232 Caffeine metabolism [PATH:ko00232]  
C 00965 Betalain biosynthesis [PATH:ko00965]  
C 00402 Benzoxazinoid biosynthesis [PATH:ko00402]  
C 00311 Penicillin and cephalosporin biosynthesis [PATH:ko00311]  
C 00331 Clavulanic acid biosynthesis [PATH:ko00331]  
C 00521 Streptomycin biosynthesis [PATH:ko00521]  
C 00231 Puromycin biosynthesis [PATH:ko00231]  
C 00401 Novobiocin biosynthesis [PATH:ko00401]  
C 00404 Staurosporine biosynthesis [PATH:ko00404]  
C 00405 Phenazine biosynthesis [PATH:ko00405]  
C 00254 Aflatoxin biosynthesis [PATH:ko00254]  
C 00999 Biosynthesis of secondary metabolites - unclassified [PATH:ko00999]  
C 00791 Atrazine degradation [PATH:ko00791]  
C 00930 Caprolactam degradation [PATH:ko00930]  
C 00363 Bisphenol degradation [PATH:ko00363]  
C 00621 Dioxin degradation [PATH:ko00621]



- C 00626 Naphthalene degradation [PATH:ko00626]
- C 00624 Polycyclic aromatic hydrocarbon degradation [PATH:ko00624]
- C 00365 Furfural degradation [PATH:ko00365]
- C 00984 Steroid degradation [PATH:ko00984]
- C 01003 Glycosyltransferases [BR:ko01003]
- C 00980 Metabolism of xenobiotics by cytochrome P450 [PATH:ko00980]
- C 00982 Drug metabolism - cytochrome P450 [PATH:ko00982]
- C 00536 Glycosaminoglycan binding proteins [BR:ko00536]
- C 00535 Proteoglycans [BR:ko00535]
- C 00351 1,1,1-Trichloro-2,2-bis(4-chlorophenyl)ethane (DDT) degradation [PATH:ko00351]
- C 01008 Polyketide biosynthesis proteins [BR:ko01008]
- C 01002 Peptidases [BR:ko01002]

### **3. Pathway statistics of *Leadbetterlla byssophila* DSM 17132**

#### **Complete Pathways:**

- C 00010 Glycolysis / Gluconeogenesis [PATH:ko00010]
- C 00020 Citrate cycle (TCA cycle) [PATH:ko00020]
- C 00030 Pentose phosphate pathway [PATH:ko00030]
- C 00040 Pentose and glucuronate interconversions [PATH:ko00040]
- C 00620 Pyruvate metabolism [PATH:ko00620]
- C 00190 Oxidative phosphorylation [PATH:ko00190]
- C 00250 Alanine, aspartate and glutamate metabolism [PATH:ko00250]
- C 00500 Starch and sucrose metabolism [PATH:ko00500]
- C 00061 Fatty acid biosynthesis [PATH:ko00061]
- C 00561 Glycerolipid metabolism [PATH:ko00561]
- C 00220 Arginine biosynthesis [PATH:ko00220]
- C 00330 Arginine and proline metabolism [PATH:ko00330]
- C 00340 Histidine metabolism [PATH:ko00340]
- C 00400 Phenylalanine, tyrosine and tryptophan biosynthesis [PATH:ko00400]
- C 00195 Photosynthesis [PATH:ko00195]
- C 00720 Carbon fixation pathways in prokaryotes [PATH:ko00720]
- C 00230 Purine metabolism [PATH:ko00230]
- C 00240 Pyrimidine metabolism [PATH:ko00240]
- C 00290 Valine, leucine and isoleucine biosynthesis [PATH:ko00290]
- C 00540 Lipopolysaccharide biosynthesis [PATH:ko00540]
- C 00550 Peptidoglycan biosynthesis [PATH:ko00550]
- C 00740 Riboflavin metabolism [PATH:ko00740]
- C 00750 Vitamin B6 metabolism [PATH:ko00750]
- C 00780 Biotin metabolism [PATH:ko00780]
- C 00770 Pantothenate and CoA biosynthesis [PATH:ko00770]
- C 00790 Folate biosynthesis [PATH:ko00790]
- C 00760 Nicotinate and nicotinamide metabolism [PATH:ko00760]
- C 00785 Lipoic acid metabolism [PATH:ko00785]

### Incomplete pathways:

- C 00051 Fructose and mannose metabolism [PATH:ko00051]
- C 00520 Amino sugar and nucleotide sugar metabolism [PATH:ko00520]
- C 00052 Galactose metabolism [PATH:ko00052]
- C 00640 Propanoate metabolism [PATH:ko00640]
- C 00310 Lysine degradation [PATH:ko00310]
- C 00660 C5-Branched dibasic acid metabolism [PATH:ko00660]
- C 00650 Butanoate metabolism [PATH:ko00650]
- C 00562 Inositol phosphate metabolism [PATH:ko00562]
- C 00680 Methane metabolism [PATH:ko00680]
- C 00680 Methane metabolism [PATH:ko00680]
- C 00920 Sulfur metabolism [PATH:ko00920]
- C 00071 Fatty acid degradation [PATH:ko00071]
- C 00072 Synthesis and degradation of ketone bodies [PATH:ko00072]
- C 01040 Biosynthesis of unsaturated fatty acids [PATH:ko01040]
- C 00350 Tyrosine metabolism [PATH:ko00350]
- C 00360 Phenylalanine metabolism [PATH:ko00360]
- C 00380 Tryptophan metabolism [PATH:ko00380]
- C 00410 beta-Alanine metabolism [PATH:ko00410]
- C 00430 Taurine and hypotaurine metabolism [PATH:ko00430]
- C 00053 Ascorbate and aldarate metabolism [PATH:ko00053]
- C 00630 Glyoxylate and dicarboxylate metabolism [PATH:ko00630]
- C 00564 Glycerophospholipid metabolism [PATH:ko00564]
- C 00565 Ether lipid metabolism [PATH:ko00565]
- C 00600 Sphingolipid metabolism [PATH:ko00600]
- C 00590 Arachidonic acid metabolism [PATH:ko00590]
- C 00260 Glycine, serine and threonine metabolism [PATH:ko00260]
- C 00270 Cysteine and methionine metabolism [PATH:ko00270]
- C 00280 Valine, leucine and isoleucine degradation [PATH:ko00280]
- C 00440 Phosphonate and phosphinate metabolism [PATH:ko00440]
- C 00450 Selenocompound metabolism [PATH:ko00450]
- C 00460 Cyanoamino acid metabolism [PATH:ko00460]
- C 00471 D-Glutamine and D-glutamate metabolism [PATH:ko00471]
- C 00480 Glutathione metabolism [PATH:ko00480]
- C 00510 N-Glycan biosynthesis [PATH:ko00510]
- C 00513 Various types of N-glycan biosynthesis [PATH:ko00513]
- C 00604 Glycosphingolipid biosynthesis - ganglio series [PATH:ko00604]
- C 00511 Other glycan degradation [PATH:ko00511]
- C 00571 Lipoarabinomannan (LAM) biosynthesis [PATH:ko00571]
- C 00730 Thiamine metabolism [PATH:ko00730]
- C 00670 One carbon pool by folate [PATH:ko00670]
- C 00830 Retinol metabolism [PATH:ko00830]
- C 00860 Porphyrin and chlorophyll metabolism [PATH:ko00860]
- C 00130 Ubiquinone and other terpenoid-quinone biosynthesis [PATH:ko00130]

- C 00900 Terpenoid backbone biosynthesis [PATH:ko00900]
- 81]
- C 00908 Zeatin biosynthesis [PATH:ko00908]
- C 00903 Limonene and pinene degradation [PATH:ko00903]
- C 00281 Geraniol degradation [PATH:ko00281]
- C 01055 Biosynthesis of vancomycin group antibiotics [PATH:ko01055]
- C 00940 Phenylpropanoid biosynthesis [PATH:ko00940]
- C 00960 Tropane, piperidine and pyridine alkaloid biosynthesis [PATH:ko00960]
- C 00966 Glucosinolate biosynthesis [PATH:ko00966]
- C 00332 Carbapenem biosynthesis [PATH:ko00332]
- C 00261 Monobactam biosynthesis [PATH:ko00261]
- C 00524 Neomycin, kanamycin and gentamicin biosynthesis [PATH:ko00524]
- C 00525 Acarbose and validamycin biosynthesis [PATH:ko00525]
- C 00333 Prodigiosin biosyntheses [PATH:ko00333]
- C 00362 Benzoate degradation [PATH:ko00362]
- C 00625 Chloroalkane and chloroalkene degradation [PATH:ko00625]
- C 00361 Chlorocyclohexane and chlorobenzene degradation [PATH:ko00361]
- C 00623 Toluene degradation [PATH:ko00623]
- C 00643 Styrene degradation [PATH:ko00643]

**Nonexistent Pathways:**

- C 00196 Photosynthesis - antenna proteins [PATH:ko00196]
- C 00710 Carbon fixation in photosynthetic organisms [PATH:ko00710]
- C 00062 Fatty acid elongation [PATH:ko00062]
- C 00073 Cutin, suberine and wax biosynthesis [PATH:ko00073]
- C 00100 Steroid biosynthesis [PATH:ko00100]
- C 00120 Primary bile acid biosynthesis [PATH:ko00120]
- C 00121 Secondary bile acid biosynthesis [PATH:ko00121]
- C 00140 Steroid hormone biosynthesis [PATH:ko00140]
- C 00591 Linoleic acid metabolism [PATH:ko00591]
- C 00592 alpha-Linolenic acid metabolism [PATH:ko00592]
- C 00472 D-Arginine and D-ornithine metabolism [PATH:ko00472]
- C 00473 D-Alanine metabolism [PATH:ko00473]
- C 00512 Mucin type O-glycan biosynthesis [PATH:ko00512]
- C 00515 Mannose type O-glycan biosynthesis [PATH:ko00515]
- C 00514 Other types of O-glycan biosynthesis [PATH:ko00514]
- C 00532 Glycosaminoglycan biosynthesis - chondroitin sulfate / dermatan sulfate [PATH:ko00532]
- C 00534 Glycosaminoglycan biosynthesis - heparan sulfate / heparin [PATH:ko00534]
- C 00533 Glycosaminoglycan biosynthesis - keratan sulfate [PATH:ko00533]
- C 00531 Glycosaminoglycan degradation [PATH:ko00531]
- C 00563 Glycosylphosphatidylinositol(GPI)-anchor biosynthesis [PATH:ko00563]
- C 00601 Glycosphingolipid biosynthesis - lacto and neolacto series [PATH:ko00601]
- C 00603 Glycosphingolipid biosynthesis - globo and isoglobo series [PATH:ko00603]

C 00902 Monoterpenoid biosynthesis [PATH:ko00902]  
C 00909 Sesquiterpenoid and triterpenoid biosynthesis [PATH:ko00909]  
C 00904 Diterpenoid biosynthesis [PATH:ko00904]  
C 00906 Carotenoid biosynthesis [PATH:ko00906]  
C 00905 Brassinosteroid biosynthesis [PATH:ko00905]  
C 00981 Insect hormone biosynthesis [PATH:ko00981]  
C 01052 Type I polyketide structures [PATH:ko01052]  
C 00522 Biosynthesis of 12-, 14- and 16-membered macrolides [PATH:ko00522]  
C 01051 Biosynthesis of ansamycins [PATH:ko01051]  
C 01059 Biosynthesis of enediyne antibiotics [PATH:ko01059]  
C 01056 Biosynthesis of type II polyketide backbone [PATH:ko01056]  
C 01057 Biosynthesis of type II polyketide products [PATH:ko01057]  
C 00253 Tetracycline biosynthesis [PATH:ko00253]  
C 00523 Polyketide sugar unit biosynthesis [PATH:ko00523]  
C 01054 Nonribosomal peptide structures [PATH:ko01054]  
C 01053 Biosynthesis of siderophore group nonribosomal peptides [PATH:ko01053]  
C 00945 Stilbenoid, diarylheptanoid and gingerol biosynthesis [PATH:ko00945]  
C 00941 Flavonoid biosynthesis [PATH:ko00941]  
C 00944 Flavone and flavonol biosynthesis [PATH:ko00944]  
C 00942 Anthocyanin biosynthesis [PATH:ko00942]  
C 00943 Isoflavonoid biosynthesis [PATH:ko00943]  
C 00901 Indole alkaloid biosynthesis [PATH:ko00901]  
C 00403 Indole diterpene alkaloid biosynthesis [PATH:ko00403]  
C 00950 Isoquinoline alkaloid biosynthesis [PATH:ko00950]  
C 01058 Acridone alkaloid biosynthesis [PATH:ko01058]  
C 00232 Caffeine metabolism [PATH:ko00232]  
C 00965 Betalain biosynthesis [PATH:ko00965]  
C 00402 Benzoxazinoid biosynthesis [PATH:ko00402]  
C 00311 Penicillin and cephalosporin biosynthesis [PATH:ko00311]  
C 00331 Clavulanic acid biosynthesis [PATH:ko00331]  
C 00521 Streptomycin biosynthesis [PATH:ko00521]  
C 00231 Puromycin biosynthesis [PATH:ko00231]  
C 00401 Novobiocin biosynthesis [PATH:ko00401]  
C 00404 Staurosporine biosynthesis [PATH:ko00404]  
C 00405 Phenazine biosynthesis [PATH:ko00405]  
C 00199 Cytochrome P450 [BR:ko00199]  
C 00254 Aflatoxin biosynthesis [PATH:ko00254]  
C 00999 Biosynthesis of secondary metabolites - unclassified [PATH:ko00999]  
C 00627 Aminobenzoate degradation [PATH:ko00627]  
C 00364 Fluorobenzoate degradation [PATH:ko00364]  
C 00622 Xylene degradation [PATH:ko00622]  
C 00535 Proteoglycans [BR:ko00535]  
C 01003 Glycosyltransferases [BR:ko01003]  
C 00536 Glycosaminoglycan binding proteins [BR:ko00536]

- C 00351 1,1,1-Trichloro-2,2-bis(4-chlorophenyl)ethane (DDT) degradation [PATH:ko00351]
- C 01008 Polyketide biosynthesis proteins [BR:ko01008]
- C 01006 Prenyltransferases [BR:ko01006]
- C 00910 Nitrogen metabolism [PATH:ko00910]
- C 01007 Amino acid related enzymes [BR:ko01007]
- C 00633 Nitrotoluene degradation [PATH:ko00633]
- C 00642 Ethylbenzene degradation [PATH:ko00642]
- C 00791 Atrazine degradation [PATH:ko00791]
- C 00930 Caprolactam degradation [PATH:ko00930]
- C 00363 Bisphenol degradation [PATH:ko00363]
- C 00621 Dioxin degradation [PATH:ko00621]
- C 00626 Naphthalene degradation [PATH:ko00626]
- C 00624 Polycyclic aromatic hydrocarbon degradation [PATH:ko00624]
- C 00365 Furfural degradation [PATH:ko00365]
- C 00984 Steroid degradation [PATH:ko00984]
- C 00980 Metabolism of xenobiotics by cytochrome P450 [PATH:ko00980]
- C 00982 Drug metabolism - cytochrome P450 [PATH:ko00982]
- C 00983 Drug metabolism - other enzymes [PATH:ko00983]
- C 01002 Peptidases [BR:ko01002]
